# Supplementary material for: The reactivity of aminoxyls towards peroxyl radicals: an ab initio thermochemical study†
Source: Royal Society of Chemistry journal article supplement (doi:10.1039/b103763n), 2001-01-01
Supplement: b103763n.doc [file b103763n.doc]

# Supplementary data

# H2NO. - CBS-QB3

Temperature= 298.150000 Pressure= 1.000000

E(ZPE)= 0.026141 E(Thermal)= 0.029402

E(SCF)= -130.445108 DE(MP2)= -0.419770

DE(CBS)= -0.045234 DE(MP34)= -0.018128

DE(CCSD)= -0.011182 DE(Int)= 0.013275

DE(Empirical)= -0.020558

CBS-Q (0 K)= -130.920564 CBS-Q Energy= -130.917302

CBS-Q Enthalpy= -130.916358 CBS-Q Free Energy= -130.943257

1|1|UNPC-UNK|Mixed|CBS-QB3|CBS-QB3|H2N1O1(2)|PCUSER|14-Dec-1999|0||# C

BS-QB3 GUESS=READ GEOM=ALLCHECK TEST||NITROSSIDO H2NO||0,2|H,0.3978148

849,0.2895812505,-1.2746624957|N,0.4189899929,0.225826626,-0.259628079

5|H,1.3183779632,0.2900238722,0.2113152479|O,-0.5811403498,-0.27004893

81,0.3600929756||Version=x86-Win32-G98RevA.7|HF/CbsB3=-130.4451081|E2(

CBS)/CbsB3=-0.4650035|CBS-Int/CbsB3=0.0132751|OIii/CbsB3=3.5198379|MP2

/CbsB4=-130.7461265|MP4(SDQ)/CbsB4=-130.7642544|MP4(SDQ)/6-31+G(d')=-1

30.7447696|QCISD(T)/6-31+G(d')=-130.7559515|CBSQB3=-130.9205638|FreqCo

ord=0.7517611266,0.5472292149,-2.4087628449,0.7917762785,0.426750444,-

0.4906259292,2.4913730999,0.5480656487,0.3993279157,-1.098196022,-0.51

03184965,0.6804770542|PG=C01 [X(H2N1O1)]|NImag=0||0.06884504,0.0192319

9,0.01033689,0.01747572,-0.02865563,0.42699095,-0.06828796,-0.01713819

,-0.04561866,0.70326245,-0.01434291,-0.00733468,0.02063275,0.18392010,

0.09050546,-0.03279482,0.00800488,-0.40393405,0.05299870,-0.11374648,0

.75609114,0.00495050,0.00234671,0.00346447,-0.30612525,-0.02500442,-0.

16390322,0.34204174,0.00155287,0.00042301,-0.00184543,-0.01492475,-0.0

0732671,0.01166392,0.03436983,0.01034620,-0.02909201,-0.00058652,-0.00

779686,-0.15106401,0.00355425,-0.16613212,0.15333605,-0.00435552,0.153

81098,-0.00550758,-0.00444051,0.02467846,-0.32884926,-0.14457277,0.143

69934,-0.04086699,-0.02099795,0.02681997,0.37522383,-0.00644195,-0.003

42522,0.00986831,-0.15185716,-0.07584407,0.09407768,-0.01171212,-0.003

44250,0.00138779,0.17001123,0.08271178,0.04441111,0.02123727,-0.015260

04,0.14368397,0.08955948,-0.18602496,0.00710269,-0.00546297,0.02011800

,-0.19519778,-0.10533377,0.18116700||-0.00001746,0.00000505,-0.0000192

0,0.00002571,-0.00000527,-0.00001446,0.00000968,0.00000543,0.00002339,

-0.00001793,-0.00000521,0.00001027|||@

**t-BuOO. – CBS-QB3**

Temperature= 298.150000 Pressure= 1.000000

E(ZPE)= 0.125200 E(Thermal)= 0.132832

E(SCF)= -306.423286 DE(MP2)= -1.126543

DE(CBS)= -0.112579 DE(MP34)= -0.065750

DE(CCSD)= -0.034413 DE(Int)= 0.036417

DE(Empirical)= -0.056542

CBS-Q (0 K)= -307.657496 CBS-Q Energy= -307.649864

CBS-Q Enthalpy= -307.648920 CBS-Q Free Energy= -307.688878

1|1|UNPC-UNK|Mixed|CBS-QB3|CBS-QB3|C4H9O2(2)|PCUSER|27-Dec-1999|0||#N

CBS-QB3 TEST||radicale terbutilperossile dopo ottimizzazione CBSB7||0,

2|C,0.8322443927,-0.9668409054,-1.260347397|C,0.2581291371,0.034895283

3,-0.2662613408|H,1.3089404527,-1.7999433947,-0.7392947559|H,0.0466922

345,-1.3658650691,-1.905703583|H,1.5809113558,-0.4792594316,-1.8890792

643|C,-0.5092864178,1.1650679059,-0.9437936508|O,-0.7334293768,-0.7971

046328,0.4969884381|C,1.2980035602,0.5434502983,0.7263689678|H,-1.0059

880748,1.783811462,-0.1955872476|H,0.1781852491,1.7920416896,-1.516927

5312|H,-1.2634764078,0.7654257405,-1.6255759028|H,2.0441443936,1.15021

29309,0.2074182006|H,0.8196577459,1.1559204348,1.4915027442|H,1.808063

1626,-0.2910550238,1.2129723978|O,-1.3655298914,-0.1242359711,1.431070

9953||Version=x86-Win32-G98RevA.7|HF/CbsB3=-306.4232858|E2(CBS)/CbsB3=

-1.2391215|CBS-Int/CbsB3=0.0364169|OIii/CbsB3=9.7421874|MP2/CbsB4=-307

.278287|MP4(SDQ)/CbsB4=-307.3440366|MP4(SDQ)/6-31+G(d')=-307.2704693|Q

CISD(T)/6-31+G(d')=-307.3048827|CBSQB3=-307.6574961|FreqCoord=1.572713

8578,-1.8270643858,-2.3817112308,0.4877933388,0.0659425237,-0.50316097

54,2.4735387909,-3.401399811,-1.3970645135,0.088235529,-2.5811107179,-

3.6012575873,2.9874892747,-0.9056690033,-3.5698421803,-0.9624117793,2.

2016591002,-1.7835113897,-1.3859805542,-1.5063093402,0.9391719675,2.45

28710611,1.0269721523,1.3726383157,-1.9010418091,3.3709148784,-0.36960

63048,0.3367212961,3.3864677535,-2.8665773786,-2.3876242037,1.44644491

41,-3.0718930298,3.862872785,2.1735872679,0.3919635641,1.5489285442,2.

1843728865,2.8185314978,3.4167439474,-0.5500142426,2.2921854636,-2.580

4773239,-0.2347719433,2.7043320513|PG=C01 [X(C4H9O2)]|NImag=0||0.56413

135,0.02600230,0.53063168,0.02757116,-0.04676263,0.53342572,-0.0882683

9,0.03068327,0.02014221,0.42380726,0.02422497,-0.13125682,-0.04521803,

-0.06041462,0.48264386,0.01774870,-0.05216762,-0.11883188,0.04711520,0

.06331862,0.46073584,-0.09645024,0.08614115,-0.05612325,-0.00779236,0.

00987723,-0.00629084,0.10123330,0.08643976,-0.19829738,0.09543800,0.00

920351,-0.01787539,0.01179544,-0.09699545,0.21599616,-0.05745456,0.098

40636,-0.11113837,0.00970325,-0.01784178,0.01090126,0.06106499,-0.1044

8787,0.11814556,-0.18743441,-0.06878022,-0.11385040,0.00932182,0.00515

622,0.00793229,-0.00963673,-0.00509019,-0.00647845,0.20090526,-0.06646

512,-0.08167230,-0.05491553,-0.01738371,-0.00913303,-0.01222825,0.0182

9854,0.01038898,0.01418548,0.07371937,0.08678731,-0.11154355,-0.055057

11,-0.13676194,-0.01669526,-0.00769041,-0.01496141,-0.01069801,-0.0059

7582,-0.00902302,0.12309481,0.06360078,0.14766660,-0.16958044,-0.08108

208,0.10429290,-0.00925333,-0.00725412,0.00518410,0.01119847,0.0060532

0,-0.00890688,-0.01515186,-0.00964027,0.01398926,0.18236259,-0.0826230

7,-0.10063282,0.06882691,0.01460997,0.01041619,-0.01119883,-0.01767747

,-0.01034297,0.01273364,-0.00653797,-0.00566016,0.00678063,0.08949072,

0.10771278,0.10371991,0.06716041,-0.13257309,0.01331827,0.01246167,-0.

01174879,0.01060106,0.00594195,-0.00896436,-0.01319473,-0.00875046,0.0

1270326,-0.11546100,-0.07346709,0.14250164,-0.00768377,0.01496496,-0.0

0616641,-0.10855242,0.04691968,-0.02590548,-0.00069997,0.00140727,0.00

165845,0.00079609,-0.00152608,-0.00049019,0.00018568,-0.00021876,-0.00

051125,0.55045340,0.01467750,-0.02118916,0.00662996,0.04464653,-0.1267

1975,0.02833496,0.00112829,-0.00174312,-0.00207120,-0.00010633,0.00077

347,0.00133402,-0.00056103,0.00046876,0.00081823,0.04182209,0.51384892

,0.00952642,-0.01720345,0.01252178,-0.02634733,0.02588915,-0.09653106,

0.00252614,-0.00443931,-0.00293208,0.00043613,-0.00020887,0.00039494,-

0.00028825,0.00036537,0.00040621,-0.02540918,0.04088243,0.55873442,-0.

01807157,-0.00469159,0.01818239,-0.04420330,-0.02815687,-0.00706871,0.

00094678,-0.00123406,-0.00048042,0.00050239,-0.00048562,-0.00096484,-0

.00029238,0.00108919,0.00092712,0.00445384,-0.00551178,0.00187120,0.18

941872,0.01539023,0.01204341,-0.01229374,-0.01886905,-0.11835213,-0.00

836925,0.00021974,0.00110336,0.00007709,0.00013405,0.00092423,0.000026

34,0.00256150,-0.00274295,-0.00386339,-0.02388143,-0.02578534,0.023656

42,-0.02275158,0.31035790,0.02563571,0.00938620,-0.02391359,-0.0035941

9,0.00170098,-0.03652297,-0.00071070,0.00103818,0.00084376,0.00004689,

0.00134090,0.00147489,0.00147179,-0.00227069,-0.00224811,0.01476672,0.

02036408,-0.01795596,-0.16541402,0.12360924,0.26924299,0.01176699,0.00

320653,0.00495696,-0.11903663,-0.01380247,-0.04792059,0.00008287,0.000

29770,0.00060063,-0.00061493,0.00307068,0.00324814,0.00001792,-0.00015

858,-0.00013424,-0.01418939,-0.00142702,-0.01679661,-0.03295266,-0.020

78116,-0.00327739,0.52546006,-0.01403340,-0.00956443,-0.01755360,-0.01

591848,-0.08377631,-0.02340491,-0.00103414,0.00054529,-0.00012663,0.00

116503,-0.00233882,-0.00255652,-0.00046293,0.00043586,0.00072371,0.018

96057,0.01030813,0.01594060,-0.02433704,-0.01595103,-0.00267955,-0.029

85912,0.56611690,-0.01725334,-0.01267810,-0.01855121,-0.04913672,-0.02

570293,-0.12898261,-0.00029507,0.00150158,0.00133537,0.00156537,-0.002

54883,-0.00242357,-0.00059917,0.00047604,0.00060431,-0.01485920,-0.003

56251,-0.01239251,0.01517677,0.01005130,0.00960497,-0.05173063,-0.0242

5519,0.53144481,-0.00105699,0.00199320,-0.00247633,-0.00888353,0.00934

697,0.01242890,0.00004860,0.00084702,0.00074277,0.00013326,0.00022792,

0.00016953,0.00021495,-0.00024135,-0.00025523,-0.10237099,0.06854145,0

.08166857,-0.00027516,-0.00059692,0.00099512,0.00035929,-0.00007702,0.

00108263,0.10930926,0.00198950,-0.00331622,0.00381282,0.01150436,-0.01

661691,-0.01818850,0.00095406,-0.00091252,-0.00097343,-0.00009564,0.00

033454,0.00022380,0.00006547,0.00026736,-0.00005077,0.06714054,-0.1304

9911,-0.10375933,0.00081177,0.00098183,-0.00119833,-0.00133352,0.00057

104,-0.00053572,-0.07704641,0.14194195,-0.00095869,0.00232578,-0.00131

850,-0.00802903,0.00811220,0.01121185,-0.00029962,0.00075388,0.0006555

6,0.00005299,0.00021646,0.00001864,-0.00014168,-0.00001053,-0.00006595

,0.08361698,-0.10684574,-0.17597140,0.00112558,-0.00150068,0.00036114,

0.00016985,0.00009250,0.00099144,-0.09021464,0.11387061,0.18902378,0.0

0018373,-0.00040940,0.00026819,0.00952810,0.00853185,-0.00873977,0.000

12346,-0.00023423,-0.00012413,-0.00003273,0.00003738,0.00009978,0.0001

0147,0.00028795,-0.00001877,-0.15272280,-0.09575125,0.08764625,0.00046

507,0.00451164,-0.00196172,0.00002764,-0.00045399,0.00009556,-0.009170

52,-0.00848643,0.00588042,0.16455692,-0.00060432,0.00072497,-0.0002733

9,-0.01724026,-0.01338337,0.01182535,0.00018708,0.00034892,-0.00012642

,0.00004589,-0.00006600,0.00011911,0.00076802,-0.00032035,-0.00040478,

-0.09438171,-0.13145194,0.07887147,0.00179016,-0.00455425,0.00310186,-

0.00078332,0.00069673,-0.00063997,0.01192654,0.01229069,-0.00904501,0.

10365987,0.14159177,0.00032084,-0.00059686,0.00000376,0.01042666,0.005

43943,-0.00805124,-0.00015840,-0.00003995,-0.00005587,-0.00008174,-0.0

0006320,0.00007114,-0.00007552,-0.00007937,0.00045577,0.08593704,0.078

90303,-0.11782352,-0.00025700,0.00273198,-0.00216358,0.00040732,-0.000

34830,0.00024291,0.01279731,0.01366611,-0.01102376,-0.09533393,-0.0881

2094,0.12539050,0.00028279,-0.00129376,-0.00026269,-0.01298309,-0.0073

7819,-0.00965340,0.00038607,0.00001790,0.00025241,0.00021931,0.0008339

1,0.00044269,-0.00008961,0.00003767,-0.00008500,-0.17089122,-0.0667311

1,-0.11178685,0.00076683,0.00003813,0.00101321,-0.00076126,0.00357770,

-0.00098671,0.01172624,0.00538545,0.00918034,-0.01329510,-0.00663572,-

0.01254906,0.18446980,0.00004536,0.00141598,0.00070804,0.01816955,0.00

887366,0.01603969,-0.00023624,0.00017160,0.00001873,0.00001501,-0.0003

4589,-0.00026607,-0.00002567,-0.00004019,-0.00009686,-0.06952425,-0.08

569954,-0.06339510,0.00045664,0.00174653,-0.00114126,0.00192903,-0.003

82912,0.00207425,-0.01315350,-0.00684955,-0.00944309,-0.01126825,-0.00

708248,-0.01220061,0.07262203,0.09096600,0.00097283,-0.00065801,0.0002

2320,-0.01052429,-0.00537313,-0.01134538,0.00021363,0.00006892,-0.0000

1516,0.00006267,0.00021623,0.00072918,0.00013940,0.00004177,0.00003725

,-0.11145869,-0.06188803,-0.14862148,-0.00019513,-0.00066567,0.0016670

6,-0.00086301,0.00315202,-0.00054805,-0.01596200,-0.00747763,-0.012706

18,0.01235786,0.00617259,0.01216997,0.12532513,0.06677546,0.15902235,0

.00038849,0.00050789,0.00073350,-0.01428382,-0.01044326,0.01331192,0.0

0003496,0.00005452,-0.00007942,0.00004426,0.00021961,-0.00014499,0.000

51484,-0.00010176,-0.00040723,0.00063415,0.00012873,0.00073901,-0.0044

0948,-0.00239757,-0.00174646,-0.16785116,-0.09899209,0.08445212,-0.000

04766,-0.00015463,0.00002698,-0.00010214,0.00052226,-0.00086869,0.0003

9360,0.00014536,-0.00010491,0.18145644,0.00024734,0.00009313,0.0004210

3,-0.00680603,-0.00761962,0.00632155,-0.00017522,-0.00000545,-0.000001

04,0.00023285,0.00018477,-0.00010234,0.00012141,-0.00001318,-0.0007423

0,0.00055143,-0.00003844,0.00056378,-0.00182189,-0.00035814,-0.0018723

3,-0.09970190,-0.12670225,0.07024671,0.00010115,0.00001782,-0.00008828

,0.00032930,0.00047220,0.00001707,0.00010041,-0.00002981,-0.00018204,0

.11046177,0.13489729,0.00051175,0.00025316,0.00043018,-0.01409508,-0.0

1123577,0.00999101,0.00002015,-0.00006034,-0.00005882,0.00005081,0.000

28242,0.00018565,-0.00008822,-0.00030572,-0.00026312,0.00046173,0.0003

7216,0.00036825,-0.00424616,-0.00383521,-0.00146718,0.08641176,0.07092

961,-0.10744083,0.00000493,0.00003770,-0.00004599,-0.00043709,0.000046

95,-0.00013309,0.00025334,-0.00016812,0.00016285,-0.09306163,-0.077242

07,0.11517705,-0.00363026,-0.00155870,-0.00224168,0.01106704,-0.013323

44,-0.01757413,-0.00008306,-0.00009101,0.00005907,0.00053153,-0.001011

09,-0.00103953,-0.00001016,0.00016186,-0.00010225,0.00111229,-0.000480

88,0.00047774,0.00135150,0.00102341,0.00118937,-0.10007880,0.06966236,

0.08452141,-0.00023475,0.00035457,-0.00028009,-0.00002087,0.00006829,0

.00010960,0.00004005,-0.00005772,0.00022752,-0.00946769,0.01298478,0.0

1387479,0.10722034,-0.00246857,-0.00026037,-0.00120401,0.00443454,-0.0

0875127,-0.00805928,-0.00009253,0.00047009,0.00019686,0.00026173,-0.00

008983,-0.00084702,0.00019548,0.00011038,-0.00005395,-0.00002571,0.000

16902,0.00112453,0.00060698,0.00030570,-0.00094475,0.06759166,-0.13131

884,-0.10360619,0.00005279,0.00057539,0.00006301,-0.00000922,-0.000023

46,0.00014467,-0.00007574,-0.00007842,0.00008409,-0.00779560,0.0117222

8,0.01384141,-0.07369337,0.13989443,-0.00410084,-0.00070125,-0.0018043

2,0.01030610,-0.01281094,-0.01660755,0.00005228,-0.00014474,0.00010292

,0.00052034,-0.00108506,-0.00064673,-0.00008994,0.00027274,0.00031704,

0.00108717,-0.00036966,0.00063968,0.00141311,0.00042348,-0.00058993,0.

08127863,-0.10426868,-0.17744256,-0.00082329,0.00053267,-0.00010687,-0

.00003615,-0.00008831,-0.00003170,-0.00005066,0.00013224,0.00042422,0.

00545972,-0.00802261,-0.01015594,-0.08893066,0.11587315,0.19315615,0.0

0036733,0.00068829,0.00121147,-0.01269572,0.01823356,-0.01051609,0.000

61661,-0.00056635,-0.00015929,-0.00001278,-0.00009828,0.00027116,0.000

04692,-0.00011645,0.00010299,-0.00270791,-0.00289524,-0.00263212,0.002

27775,0.00056586,-0.00016257,-0.10228209,0.09262936,-0.05212803,0.0002

9392,-0.00028559,0.00014040,0.00025544,0.00012209,-0.00011378,-0.00046

318,0.00103854,-0.00092244,0.01187807,-0.01751863,0.00965572,-0.006511

52,0.01029351,-0.00696049,0.10967724,-0.00036871,0.00087232,-0.0001526

3,-0.00553581,0.00818899,-0.00547880,-0.00012596,0.00013734,-0.0000638

7,-0.00003147,0.00018766,0.00007423,0.00009172,-0.00004562,-0.00000678

,-0.00162232,-0.00015098,-0.00125722,0.00057169,0.00134245,-0.00016675

,0.09451693,-0.20505817,0.08949896,-0.00024151,0.00002476,-0.00002994,

-0.00001559,0.00003300,-0.00023155,-0.00032096,0.00060734,-0.00025391,

0.00834515,-0.01306517,0.00629419,0.00651727,-0.01314718,0.00848584,-0

.10216138,0.22005359,0.00008164,0.00150706,0.00068888,-0.00897400,0.01

785256,-0.01095517,0.00007971,-0.00095519,-0.00015257,0.00024028,-0.00

017551,0.00036780,-0.00006576,0.00001342,-0.00009497,-0.00289334,-0.00

274905,-0.00228469,0.00118371,-0.00017263,0.00056379,-0.05279144,0.087

01968,-0.09786730,-0.00011962,0.00009084,0.00006526,0.00021300,-0.0003

1634,0.00023642,-0.00098025,0.00102147,-0.00029454,-0.00734680,0.01089

666,-0.00702284,0.00987159,-0.01762389,0.01182718,0.06138775,-0.096539

80,0.10473035,-0.00494469,-0.00637188,0.00376200,-0.02777161,0.0184824

9,0.02994786,-0.00000874,-0.00010957,-0.00039841,0.00042955,0.00020279

,0.00026102,-0.00026501,0.00199808,0.00150032,0.00218301,0.00252004,-0

.00163109,-0.09997834,0.06483315,0.13174825,0.00005209,-0.00082685,0.0

0009503,-0.00004590,-0.00080350,-0.00026980,0.00010234,0.00055514,-0.0

0056066,0.00019877,-0.00015588,0.00073143,0.00081718,0.00089326,0.0006

8315,-0.00128561,0.00072406,0.00087468,-0.00074007,0.00038094,0.000113

52,0.13125702,-0.00245377,0.00040801,0.00253683,0.00891626,0.02336193,

0.00145980,-0.00046908,0.00001510,0.00007407,-0.00008831,-0.00027493,0

.00033638,-0.00032143,0.00038691,0.00033042,-0.00058634,-0.00229100,0.

00296955,0.08366400,-0.16106158,-0.15026781,-0.00276545,-0.00013504,-0

.00031938,-0.00168032,0.00118894,0.00152884,-0.00072959,0.00072360,0.0

0077846,-0.00017771,0.00017391,-0.00001264,-0.00050034,0.00044460,0.00

078960,-0.00055634,0.00042209,0.00177112,0.00007070,0.00001966,0.00013

071,-0.08232229,0.13661780,0.00522205,0.00678612,-0.00240069,0.0263841

9,-0.00890162,-0.03830190,0.00001794,-0.00043476,0.00035584,-0.0003972

5,0.00013342,0.00020457,0.00063894,-0.00217831,-0.00106707,0.00016568,

-0.00015264,0.00144735,0.13874637,-0.12987528,-0.19889729,-0.00355937,

-0.00266478,0.00142485,-0.00003864,-0.00005083,-0.00108902,0.00009043,

-0.00112220,0.00071232,-0.00011249,-0.00005878,-0.00090529,-0.00096309

,-0.00021378,0.00027283,-0.00016276,0.00101137,0.00091841,0.00082532,-

0.00017197,0.00019240,-0.16685732,0.13789404,0.23713271||-0.00000676,-

0.00000214,0.00000689,-0.00000143,0.00000307,0.00000899,-0.00000475,0.

00000602,-0.00000001,0.00000198,0.00000219,0.00000559,-0.00000293,-0.0

0000223,0.00000133,0.00000009,0.00000678,-0.00002062,-0.00001380,-0.00

002076,0.00000279,0.00002630,0.00000662,-0.00000148,0.00000669,-0.0000

0372,0.00000156,-0.00000455,-0.00000441,0.00000547,0.00000479,0.000004

74,0.00000699,-0.00000556,-0.00000347,0.00000387,-0.00000039,-0.000002

08,-0.00000827,-0.00000561,0.00000782,-0.00000292,0.00000594,0.0000015

6,-0.00001016|||@

**H2NO3-*t*-Bu – CBS-QB3**

Temperature= 298.150000 Pressure= 1.000000

E(ZPE)= 0.156141 E(Thermal)= 0.166607

E(SCF)= -436.802079 DE(MP2)= -1.627920

DE(CBS)= -0.159200 DE(MP34)= -0.071062

DE(CCSD)= -0.047272 DE(Int)= 0.051194

DE(Empirical)= -0.078394

CBS-Q (0 K)= -438.578593 CBS-Q Energy= -438.568127

CBS-Q Enthalpy= -438.567183 CBS-Q Free Energy= -438.613644

1|1|UNPC-UNK|Mixed|CBS-QB3|CBS-QB3|C4H11N1O3|PCUSER|13-Jan-2000|0||#N

CBS-QB3 TEST||H2N-O-OO-But||0,1|H,2.0894897635,0.4551241787,-2.4250884

778|N,1.9880808191,1.240357783,-1.7891523603|H,2.8454638055,1.78434883

84,-1.754311588|O,1.822075035,0.6935184456,-0.5159848507|O,0.566323264

3,1.2164018481,0.0368027261|O,-0.5009486847,0.4308938233,-0.4640820418

|C,-0.8879374582,-0.6061018487,0.4969190463|C,-2.0655675457,-1.2616065

171,-0.2274736281|C,0.2556743972,-1.5974890744,0.7173679964|C,-1.33018

02677,0.052962735,1.8047143873|H,-2.4852738093,-2.058196112,0.39151639

63|H,-2.8484311501,-0.5276275691,-0.4288596776|H,-1.7422290897,-1.6927

322665,-1.1773442832|H,-0.0752394774,-2.4062643418,1.3749798792|H,0.57

80257216,-2.0313087642,-0.2314566527|H,1.1133843982,-1.1074503134,1.17

91996059|H,-1.6830978468,-0.7031105222,2.5112617756|H,-0.4990780995,0.

5908544501,2.2628466805|H,-2.1411116206,0.7607532361,1.6182693831||Ver

sion=x86-Win32-G98RevA.7|HF/CbsB3=-436.8020794|E2(CBS)/CbsB3=-1.787120

1|CBS-Int/CbsB3=0.0511937|OIii/CbsB3=13.5395266|MP2/CbsB4=-438.0319422

|MP4(SDQ)/CbsB4=-438.1030044|MP4(SDQ)/6-31+G(d')=-438.0093091|QCISD(T)

/6-31+G(d')=-438.0565815|CBSQB3=-438.578593|FreqCoord=3.948563109,0.86

00599885,-4.5827527212,3.7569279913,2.3439363378,-3.3810077128,5.37714

69028,3.3719303725,-3.3151681998,3.4432225468,1.3105598302,-0.97506998

2,1.0701957905,2.298666185,0.069547068,-0.9466557483,0.8142712561,-0.8

769878952,-1.6779584911,-1.1453664152,0.9390408359,-3.9033566723,-2.38

40906227,-0.4298628267,0.483154553,-3.0188166204,1.3556289462,-2.51367

62214,0.1000850567,3.4104156796,-4.6964865061,-3.8894266824,0.73985870

91,-5.382754371,-0.9970715295,-0.8104272782,-3.2923355889,-3.198800155

7,-2.2248580895,-0.1421819959,-4.5471802621,2.5983352114,1.0923102281,

-3.8386169626,-0.4373896519,2.1039914325,-2.0927776382,2.2283641409,-3

.1805937424,-1.3286862267,4.7455966415,-0.943120855,1.1165530098,4.276

1601803,-4.0461142739,1.4376151612,3.0580857098|PG=C01 [X(C4H11N1O3)]|

NImag=0||0.03702773,-0.00819095,0.29266502,-0.03423917,0.18507283,0.20

847457,-0.03191399,-0.00204324,0.02359323,0.41268507,0.02448410,-0.292

90660,-0.16547114,0.19372691,0.49699714,0.05878607,-0.20330284,-0.1658

3785,-0.07093422,0.17590010,0.43030277,0.00056571,0.01131779,-0.000265

13,-0.30802972,-0.21153073,-0.01023696,0.30980944,-0.02604111,-0.01570

705,-0.00162816,-0.15671204,-0.12554600,-0.03029293,0.19239018,0.15348

163,-0.02371331,-0.00994905,0.00219320,-0.02891863,-0.03652743,-0.0548

8800,0.01120362,0.01597123,0.07271322,-0.00142118,-0.00165098,0.015420

32,-0.07454436,0.02620733,-0.03239769,0.00200053,-0.01731952,0.0400646

6,0.18194708,0.00604100,0.01575824,-0.01928938,-0.01458438,-0.09554204

,0.07490911,0.01007295,-0.01129417,0.02605132,-0.04207683,0.15916954,-

0.00956801,0.02740921,-0.04170473,0.04009570,0.03115587,-0.16735576,-0

.00398004,0.01917687,-0.01800171,-0.00932886,-0.08108408,0.25739470,-0

.00473071,0.00156160,-0.00451518,-0.00008616,-0.03008449,0.05526634,-0

.00392389,0.00631536,-0.00037210,-0.03780695,0.04443897,-0.01507008,0.

14674380,0.00526797,0.00114548,0.00076357,-0.01940165,0.01753690,-0.01

802348,-0.00251238,-0.00070239,0.00359373,0.05330369,-0.09464672,-0.01

833141,0.04347769,0.20916435,0.00991258,0.00147496,-0.00440701,0.03240

032,-0.00770910,-0.04427824,0.00289681,-0.00366444,-0.00193132,-0.0024

2995,-0.02205590,-0.04117126,-0.01126059,0.08264532,0.17052783,0.00088

415,-0.00103643,-0.00006872,0.00303010,-0.00243591,-0.00142276,-0.0003

4825,0.00147010,0.00141833,-0.07263267,0.00081708,-0.00532869,-0.07969

036,-0.05088317,-0.05107933,0.23073881,-0.00154060,-0.00145494,0.00074

571,-0.00043093,0.00023109,0.00187224,0.00009090,0.00010784,0.00094834

,-0.02182647,0.02738646,0.02002063,-0.03913461,-0.09933155,-0.05926283

,0.07952645,0.19743400,-0.00089127,-0.00067177,0.00133260,0.00328639,0

.00325350,0.00122439,0.00054772,0.00023515,-0.00039781,-0.01266017,0.0

1837653,0.01423365,-0.02700076,-0.03907446,-0.09520914,0.04489596,-0.0

5301081,0.24994899,-0.00023838,-0.00003380,0.00012529,-0.00129780,0.00

013426,0.00066955,-0.00000754,-0.00019086,0.00021268,0.00206193,-0.003

62276,0.00259391,-0.02400151,-0.02808634,0.01112803,-0.06406513,0.0128

0152,-0.01938698,0.49685558,0.00034127,0.00069337,-0.00031030,-0.00024

084,0.00016322,-0.00196465,0.00036524,-0.00063684,-0.00043049,0.006542

93,0.00108567,-0.00021714,-0.02971686,-0.03193815,0.00183810,0.0026605

5,-0.07319720,0.03204436,-0.02627738,0.43825695,-0.00047839,-0.0002225

2,0.00006369,0.00068733,-0.00129665,0.00115601,-0.00035185,0.00046906,

0.00054290,-0.00317322,0.00245463,-0.00221552,0.00214884,-0.01549126,0

.01740435,-0.00174200,0.04796607,-0.13457173,0.03899432,0.04980992,0.4

7821067,-0.00005795,0.00001025,-0.00001807,0.00005669,-0.00011176,0.00

002487,0.00001467,0.00001726,0.00002924,0.00023057,-0.00002086,-0.0001

3973,0.00079674,-0.00047373,0.00222059,-0.01968172,-0.01933759,-0.0022

2127,-0.13375065,-0.02818973,-0.03830975,0.50903358,-0.00011189,-0.000

02417,0.00004828,-0.00008280,-0.00032658,0.00051119,-0.00011370,0.0001

0941,0.00011798,0.00049637,0.00000872,-0.00029783,-0.00378047,-0.00567

378,0.00215037,-0.03020143,-0.02190273,-0.00758741,-0.02589811,-0.0891

5332,-0.02074313,-0.03838587,0.55872885,0.00036542,0.00008767,-0.00002

531,-0.00013588,0.00053204,-0.00063011,0.00013897,-0.00015284,-0.00022

055,0.00007490,-0.00028936,0.00072860,0.00681838,0.00808298,-0.0008428

2,0.01419715,0.00739854,0.01029693,-0.04220566,-0.02444762,-0.10280054

,-0.04388795,-0.02340045,0.55024048,-0.00008664,0.00001013,0.00001275,

0.00019954,0.00013096,0.00018037,-0.00005758,0.00009818,-0.00005003,-0

.00081673,0.00013408,0.00024127,0.00269435,0.00041455,-0.00077518,0.00

950127,-0.00949378,0.00335597,-0.14245647,0.05068364,-0.01048356,-0.02

744920,0.01731615,-0.00787526,0.51954223,0.00015706,0.00018713,-0.0000

7736,0.00012294,-0.00002524,-0.00020254,-0.00001022,0.00002972,-0.0000

1677,-0.00176107,-0.00152364,0.00066665,0.00320094,0.00101329,0.000305

82,0.01400139,-0.03201863,0.01900294,0.04628442,-0.11165493,-0.0000424

8,-0.00741952,0.01152055,-0.00172939,0.05815527,0.52255039,0.00023544,

0.00017834,-0.00010388,-0.00018284,0.00093340,-0.00037033,0.00002709,-

0.00006504,-0.00019460,0.00127699,0.00006751,-0.00055810,-0.00120740,-

0.00139739,-0.00016689,-0.01519486,0.02671170,-0.01143903,-0.00514176,

0.00038431,-0.07686353,-0.01488296,0.00867622,-0.00293131,-0.01265994,

0.01647459,0.57788081,0.00008259,0.00003576,-0.00007390,0.00007444,0.0

0001646,-0.00028401,-0.00000084,0.00000980,0.00000208,-0.00110335,-0.0

0013552,-0.00007098,0.00201753,0.00213795,0.00256681,-0.00458524,-0.00

402310,0.01646353,-0.08786885,0.01509696,0.01975790,0.00775601,-0.0108

2528,-0.02339438,-0.01003616,0.01633976,0.02241923,0.56990996,-0.00000

444,-0.00011221,0.00002459,-0.00002062,-0.00007837,0.00026811,-0.00010

097,0.00012544,0.00006126,-0.00098025,-0.00018092,-0.00004016,0.002416

42,0.00337717,0.00068899,-0.01210731,0.00169737,0.03380874,0.01525601,

-0.10118210,-0.04955620,0.00298899,-0.00805873,-0.01763399,0.01011104,

-0.01082607,-0.02066569,0.01381322,0.55859068,0.00005866,0.00008638,-0

.00007838,0.00003265,0.00000945,-0.00033209,0.00007020,-0.00010224,-0.

00001762,-0.00015526,-0.00001348,-0.00015704,-0.00043236,-0.00113120,-

0.00169101,0.01443830,0.00595054,-0.03453364,0.02112508,-0.04226968,-0

.14113300,-0.00028869,-0.01208622,-0.01827867,0.00179034,-0.00397291,0

.00436286,0.03212782,-0.04167665,0.49189399,-0.00006749,-0.00002766,0.

00000914,0.00001157,-0.00012463,0.00022303,-0.00005009,0.00005042,0.00

004832,0.00019956,0.00020909,-0.00016375,-0.00079879,-0.00233677,0.000

24792,-0.00402661,-0.00091774,-0.00322051,-0.00870796,-0.01695572,0.01

663626,-0.08361839,-0.07254032,0.05616668,0.00081075,0.00000672,0.0008

1709,0.00068367,0.00050819,0.00077897,0.08955322,-0.00005467,-0.000034

75,0.00000087,0.00001693,-0.00012717,0.00015454,-0.00004722,0.00004858

,0.00005846,-0.00032106,0.00006448,-0.00013062,-0.00021135,0.00002756,

0.00062015,-0.00249932,-0.00121518,-0.00252799,-0.00286767,-0.01070412

,0.00924242,-0.07344053,-0.18539605,0.10919509,0.00076788,0.00007162,0

.00034693,0.00045008,0.00016295,0.00066962,0.08158068,0.20015916,-0.00

011068,-0.00000052,-0.00000178,0.00001931,-0.00011172,0.00014100,-0.00

001744,0.00002355,0.00004601,0.00011618,-0.00013903,-0.00018122,-0.001

78378,-0.00135010,0.00067813,-0.00131171,-0.00049545,-0.00139209,-0.00

535012,-0.01157949,0.00815145,0.05773601,0.11064523,-0.13238490,0.0003

3804,0.00008301,0.00017249,0.00023098,-0.00002077,0.00028905,-0.061147

76,-0.12061530,0.14242911,0.00000275,0.00004583,-0.00002416,0.00003236

,0.00002002,-0.00007716,-0.00000114,-0.00002491,-0.00001563,0.00043213

,-0.00010700,0.00008360,0.00024309,-0.00034613,0.00016994,0.00105829,0

.00127516,-0.00008982,-0.01974981,0.01842661,-0.00420437,-0.17957815,0

.12674350,-0.03357794,-0.00334734,-0.00407751,-0.00229316,0.00065567,0

.00085857,0.00137463,0.01046694,-0.00906935,0.00188740,0.19607605,0.00

002074,-0.00000975,0.00000539,-0.00002244,0.00004387,-0.00005766,0.000

02762,-0.00001482,-0.00001432,0.00005214,-0.00004350,0.00005084,0.0003

3887,0.00040466,0.00002856,-0.00048658,0.00051004,-0.00028218,-0.01044

717,0.00950238,-0.00265136,0.12957042,-0.17001736,0.03188510,-0.001959

89,-0.00089514,-0.00076018,-0.00043909,0.00072680,0.00035978,0.0165346

5,-0.01496979,0.00274953,-0.13973376,0.18207540,0.00000709,-0.00001411

,0.00000296,0.00000977,0.00001135,-0.00004155,-0.00000378,-0.00000348,

-0.00000243,0.00007569,0.00000617,-0.00000773,0.00000307,-0.00012159,-

0.00022976,0.00131394,0.00041415,0.00056664,-0.01067862,0.01192023,-0.

00424669,-0.03326885,0.03041918,-0.05628389,-0.00204369,-0.00212183,-0

.00134287,-0.00039523,0.00131142,0.00051205,-0.01388009,0.01167153,-0.

00357857,0.03926631,-0.03367938,0.05747144,-0.00001118,-0.00002320,0.0

0001860,-0.00003977,0.00004344,-0.00003006,0.00002126,-0.00002116,-0.0

0000489,0.00005206,-0.00001732,0.00004413,0.00017521,0.00054164,0.0001

0400,0.00088263,0.00064250,-0.00014475,0.00798521,-0.00974785,-0.02325

168,-0.07318880,0.03327690,0.07172118,0.00158483,-0.00058241,-0.000484

61,-0.00394408,-0.00217701,-0.00144396,-0.00443685,0.00551356,0.009553

58,-0.00670676,0.00737611,0.02022129,0.07748956,-0.00010834,0.00000673

,-0.00001248,0.00003975,-0.00000008,0.00000246,0.00001764,-0.00001975,

0.00001792,0.00007840,-0.00003555,-0.00002871,0.00001923,0.00030811,0.

00067529,0.00046692,0.00049481,-0.00071005,0.00482445,-0.00744864,-0.0

1256895,0.03213331,-0.08695058,-0.08878727,0.00074093,0.00009318,0.000

86766,-0.00285380,-0.00116719,-0.00049995,-0.00691310,0.01084798,0.021

09340,0.00591414,-0.00822587,-0.01942911,-0.03420313,0.09104413,-0.000

05388,-0.00002284,0.00001960,0.00000332,-0.00003994,0.00007391,-0.0000

1246,0.00000119,0.00002040,0.00002172,-0.00000835,-0.00006510,-0.00030

794,0.00023230,0.00031433,0.00091101,0.00105806,0.00093296,0.00576392,

-0.00570958,-0.01521963,0.06901807,-0.08961303,-0.24476602,0.00125428,

-0.00003362,0.00027860,-0.00388635,-0.00127207,-0.00035440,0.00480333,

-0.00728836,-0.01466317,-0.00173165,0.00266207,0.00660058,-0.07536829,

0.09990896,0.26631522,0.00000847,0.00007401,-0.00005988,-0.00000764,-0

.00019602,-0.00015176,0.00003238,-0.00004305,0.00005241,0.00041221,-0.

00093845,0.00042044,-0.00098574,-0.00062201,0.00037530,-0.00333236,0.0

0637516,-0.00316578,0.00873584,0.01594478,-0.01427234,0.00087983,-0.00

022985,-0.00006786,-0.07215501,-0.05992400,0.04953033,0.00035094,-0.00

047031,0.00024620,-0.00060200,0.00005568,-0.00024634,0.00028318,-0.000

08200,0.00023463,-0.00006223,-0.00002651,-0.00004399,0.07687312,-0.000

08015,-0.00007148,-0.00000917,0.00011435,-0.00028178,0.00023042,-0.000

01528,0.00006157,0.00005988,-0.00021968,0.00038480,-0.00015292,0.00082

420,0.00111355,0.00023952,0.00335883,-0.00443019,0.00164247,-0.0102434

8,-0.01427786,0.01207516,-0.00108896,0.00039261,-0.00024468,-0.0581641

6,-0.18767104,0.11415942,-0.00056465,0.00029602,0.00015148,0.00044425,

0.00059886,-0.00002026,0.00004928,0.00008733,-0.00027957,0.00008149,0.

00002091,-0.00008509,0.06416832,0.20298530,-0.00003533,-0.00006076,0.0

0005712,-0.00008381,-0.00003711,0.00008446,0.00000908,-0.00003246,0.00

000185,0.00055407,0.00022209,0.00006699,-0.00024469,-0.00055249,0.0000

8469,-0.00188602,0.00142806,0.00087813,0.00235709,0.00279305,-0.005050

26,0.00052085,-0.00002141,-0.00005531,0.04840560,0.11504910,-0.1407574

3,0.00032704,-0.00030179,-0.00022902,-0.00063315,-0.00015531,0.0002117

7,-0.00004872,-0.00025100,0.00011483,-0.00000527,0.00017581,-0.0000333

3,-0.05391022,-0.12796180,0.15051111,0.00005814,-0.00006595,0.00008244

,0.00001615,0.00004668,0.00004994,-0.00000396,-0.00000568,-0.00003510,

-0.00011239,0.00030251,-0.00030736,0.00008373,-0.00006492,0.00022668,0

.00161011,-0.00186109,-0.00063131,-0.00850312,0.00850541,0.02383864,0.

00094224,0.00014347,0.00148673,-0.06874417,0.02962855,0.06423696,-0.00

352260,0.00307286,-0.00206860,-0.00007151,0.00004002,-0.00001137,0.000

33225,-0.00019545,-0.00024833,-0.00047399,-0.00011751,-0.00086550,-0.0

0362529,0.00397926,0.00785716,0.07349293,-0.00015442,-0.00017731,0.000

16461,-0.00011737,-0.00010190,0.00021575,0.00002123,-0.00000166,0.0000

0536,0.00022725,0.00069167,-0.00000283,0.00000935,-0.00073810,-0.00005

333,-0.00140282,0.00194955,-0.00011184,0.00657258,-0.00992093,-0.02049

851,-0.00124925,0.00017390,-0.00023126,0.02916103,-0.08657110,-0.08892

708,0.00334423,-0.00256276,0.00201114,-0.00007217,0.00002678,0.0001206

2,-0.00017085,-0.00004406,0.00013655,0.00026888,0.00058268,0.00045020,

-0.00673358,0.01098004,0.02133873,-0.03525636,0.09145147,-0.00000263,-

0.00007791,0.00004900,-0.00003704,0.00000254,0.00026972,-0.00000857,0.

00000414,-0.00000773,0.00028618,0.00080342,-0.00016798,0.00027814,-0.0

0007946,-0.00003555,-0.00038273,-0.00085750,0.00146181,-0.00186549,0.0

0258410,0.00290911,-0.00026271,0.00037989,0.00045258,0.06633098,-0.091

22656,-0.24950662,-0.00032162,0.00056450,0.00095428,-0.00001402,-0.000

10330,-0.00004814,0.00005646,0.00007271,0.00025385,0.00008414,0.000162

07,0.00043218,0.00426383,-0.00758000,-0.01546110,-0.07224802,0.0991098

8,0.26929638,-0.00004583,0.00001583,-0.00002063,-0.00009809,-0.0002846

2,0.00010246,0.00001828,-0.00003101,0.00005963,0.00056709,-0.00043954,

0.00034495,0.00057449,-0.00001379,0.00081603,0.00019556,-0.00082088,0.

00075546,-0.02011590,-0.01289235,-0.01037987,-0.00259224,0.00462779,-0

.00018431,-0.21048054,-0.09433650,-0.08898260,0.00085307,-0.00112326,-

0.00067141,0.00035528,0.00007005,0.00021955,-0.00113088,-0.00060073,-0

.00091580,0.00015527,-0.00002697,-0.00007487,-0.00669351,-0.00343522,-

0.00326735,0.00851570,0.00483497,0.00419991,0.22946804,0.00000740,0.00

005220,-0.00004840,-0.00030984,-0.00000311,-0.00030976,0.00002568,-0.0

0004667,0.00004213,-0.00099397,-0.00123243,0.00184548,0.00068344,-0.00

092934,-0.00010624,-0.00069738,0.00138285,-0.00077159,0.01816135,0.011

17375,0.00951794,0.00279728,-0.00307683,0.00075073,-0.09715656,-0.1037

7933,-0.05412886,-0.00037235,0.00094096,0.00075952,0.00013559,0.000042

35,-0.00019446,0.00116272,0.00060241,0.00064388,-0.00002832,-0.0001133

8,0.00011352,-0.01749535,-0.01062701,-0.01096766,-0.00915177,-0.005916

87,-0.00401231,0.10347726,0.11166897,-0.00010324,0.00001989,-0.0000876

7,0.00025768,-0.00047230,0.00001671,0.00001416,0.00001707,0.00009846,0

.00080092,0.00021904,-0.00055669,-0.00082354,0.00011843,0.00063072,-0.

00008805,-0.00000929,0.00003643,-0.00382558,-0.00189422,-0.00371305,-0

.00056420,0.00130295,0.00012037,-0.08779334,-0.05232315,-0.09485990,0.

00084317,0.00027525,0.00012354,-0.00009952,-0.00023218,0.00008959,-0.0

0054040,-0.00015788,0.00036097,0.00027542,0.00012290,0.00043186,0.0165

6038,0.00861654,0.00925325,-0.02243684,-0.01265822,-0.01136330,0.09735

702,0.05707615,0.09902706,-0.00003480,-0.00002702,0.00001559,-0.000033

36,-0.00005581,0.00017647,-0.00002891,0.00004378,0.00002043,0.00023895

,0.00003717,-0.00010553,0.00043612,0.00034022,0.00054222,-0.00061134,-

0.00027039,0.00204120,-0.00416185,-0.00725082,0.00317332,-0.00008661,-

0.00012031,-0.00051893,0.00002829,-0.00012563,-0.00016187,-0.07379481,

-0.05728501,0.05486348,0.00034394,-0.00003369,-0.00023600,0.00005877,0

.00009185,-0.00009169,-0.00010341,0.00009795,0.00003474,-0.00017855,0.

00071570,0.00032113,0.00009757,0.00006216,-0.00026965,-0.00005513,-0.0

0011504,0.00013575,0.07592557,-0.00004986,-0.00000634,0.00000174,-0.00

002054,-0.00004041,0.00012995,-0.00000002,0.00001594,0.00001512,0.0002

0841,0.00006214,-0.00005985,-0.00027478,-0.00015239,0.00046647,0.00088

020,0.00127904,-0.00455287,0.00451112,0.00886284,-0.00767150,-0.000097

62,0.00020866,0.00030489,0.00006016,-0.00025947,0.00030131,-0.05827900

,-0.17417579,0.11697464,0.00000012,0.00020704,-0.00028214,-0.00010893,

-0.00003122,-0.00002479,0.00016623,0.00017412,0.00017123,0.00043807,0.

00009954,-0.00052121,-0.00020776,0.00028215,0.00005048,0.00006424,-0.0

0004161,0.00004077,0.06402274,0.18799080,-0.00000116,0.00005464,0.0000

0875,-0.00006359,0.00003758,-0.00008405,0.00003634,-0.00005969,-0.0000

2442,0.00060699,-0.00009429,0.00011655,-0.00222397,-0.00113520,0.00049

150,0.00365397,-0.00067481,-0.00777587,0.00708067,0.02185987,-0.014205

39,0.00008043,0.00103810,0.00100033,-0.00047840,0.00063744,0.00077368,

0.05460401,0.11470786,-0.15418590,-0.00052032,-0.00080661,-0.00020167,

0.00006567,-0.00005806,-0.00007310,-0.00000181,-0.00019509,0.00038435,

0.00035554,-0.00080644,0.00024919,-0.00031901,-0.00015009,0.00020050,-

0.00004121,-0.00005963,-0.00003111,-0.06072724,-0.12732066,0.16725885,

-0.00002887,0.00000573,0.00001863,-0.00008400,0.00004010,0.00007458,0.

00000705,-0.00001386,-0.00000137,0.00007174,0.00006155,0.00034039,-0.0

0090850,-0.00039655,0.00152585,0.00004618,-0.00045532,-0.00134914,0.00

797209,0.00611727,0.00343287,-0.00006719,0.00057004,0.00150025,0.00093

713,0.00007985,0.00009669,-0.20528591,-0.10020899,-0.08606500,-0.00005

880,0.00016045,0.00006970,0.00016127,-0.00004529,0.00029523,0.00056406

,0.00008562,0.00042624,-0.00004528,0.00001619,-0.00003956,0.00011616,-

0.00009198,-0.00007727,0.00006503,0.00005054,0.00008274,-0.00734834,-0

.00353793,-0.00348203,0.22097373,0.00000765,0.00001402,-0.00000307,-0.

00000182,-0.00000819,-0.00004542,-0.00000444,-0.00000476,-0.00000428,0

.00008028,-0.00010306,0.00000678,-0.00020366,0.00005196,0.00172156,-0.

00013499,-0.00036715,0.00045693,-0.01148331,-0.00804011,-0.00491161,0.

00170336,-0.00070034,-0.00235646,-0.00103463,0.00023636,0.00025620,-0.

09904471,-0.11155632,-0.05498816,0.00032717,0.00029292,0.00015279,-0.0

0024222,0.00009810,-0.00015287,-0.00082034,0.00006805,-0.00059229,-0.0

0002550,-0.00004886,-0.00011659,0.00017453,0.00026070,0.00021423,0.000

80611,-0.00017008,-0.00015776,-0.01635562,-0.01086792,-0.00994564,0.10

960756,0.11898409,-0.00015245,-0.00002862,0.00003334,-0.00003162,-0.00

015275,0.00045921,-0.00005643,0.00007538,0.00005732,0.00096371,-0.0001

7361,-0.00034581,0.00029589,0.00103683,-0.00012875,-0.00092068,-0.0000

9637,0.00184892,-0.02368484,-0.01463048,-0.01278986,0.00315505,-0.0017

2383,-0.00488396,-0.00089550,0.00123942,0.00069400,-0.08329117,-0.0531

3795,-0.09107721,0.00006787,-0.00010677,0.00028592,0.00025143,0.000138

95,0.00018575,-0.00130255,-0.00107554,-0.00086639,0.00008035,0.0001346

8,0.00001931,0.00006946,0.00031986,0.00002725,0.00067494,-0.00029542,0

.00050859,0.01709447,0.00994242,0.00988504,0.09176745,0.06124317,0.099

06257,0.00000747,0.00002230,-0.00001116,0.00002889,-0.00002634,-0.0000

1908,-0.00001732,0.00000816,-0.00000036,0.00022378,-0.00017175,-0.0001

0136,-0.00083245,-0.00034625,0.00041197,0.00102658,-0.00059918,-0.0005

8448,-0.00868567,0.00658691,-0.00202245,0.00036059,-0.00088424,-0.0006

2147,0.00033143,0.00025994,0.00255221,-0.19224210,0.12545290,-0.035781

09,0.00001359,-0.00011046,0.00004443,0.00071133,-0.00000002,0.00009903

,0.00005698,-0.00016899,0.00010832,0.00011164,0.00005972,-0.00019789,-

0.00020793,0.00074711,-0.00000988,0.00044432,-0.00018065,-0.00005253,0

.00930789,-0.00777483,0.00137513,-0.01708755,0.01664457,-0.00408538,0.

20644857,0.00000925,-0.00001760,0.00002188,-0.00003246,0.00001519,0.00

000540,0.00000580,-0.00000596,-0.00000040,-0.00004695,-0.00000965,0.00

001324,0.00012015,-0.00003061,-0.00000327,-0.00129619,0.00144453,0.000

48035,0.01060519,-0.01158395,0.00411892,0.00059456,0.00013776,0.001036

34,0.00002494,-0.00047776,-0.00341326,0.12529331,-0.15601698,0.0297680

0,0.00009122,-0.00010321,-0.00005888,-0.00061517,0.00020054,-0.0007077

2,-0.00029002,0.00032037,0.00006765,-0.00026935,0.00038775,-0.00002730

,0.00103321,-0.00036425,-0.00001092,0.00010863,0.00007321,0.00009601,0

.01622777,-0.01360708,0.00297069,-0.01204498,0.01186060,-0.00270936,-0

.13951893,0.16777713,-0.00001572,-0.00003300,0.00001177,0.00000197,-0.

00001766,0.00008980,-0.00001137,0.00002764,0.00001282,-0.00011714,0.00

003768,-0.00005187,0.00043172,0.00021491,-0.00003979,-0.00140312,-0.00

010699,0.00255786,0.02208852,-0.01978029,0.00437103,0.00105906,0.00018

398,0.00126409,0.00114531,-0.00171233,-0.00506800,-0.03762494,0.032594

61,-0.05606788,-0.00011952,0.00000678,-0.00004296,-0.00055243,-0.00004

093,-0.00026248,0.00001553,0.00028069,0.00016404,-0.00020124,-0.000169

65,0.00005375,0.00132340,-0.00123954,0.00028376,0.00000812,0.00014499,

-0.00008582,-0.01630790,0.01203395,-0.00378720,-0.00861625,0.00922252,

-0.00297524,0.03889603,-0.03164738,0.05957228||0.00000192,-0.00000153,

0.00000461,0.00000480,0.00000349,-0.00003332,-0.00000503,0.00000693,0.

00000553,-0.00000444,-0.00001845,0.00001384,0.00001730,0.00000924,0.00

001185,-0.00002369,-0.00002029,-0.00000007,0.00001171,0.00003121,-0.00

001391,-0.00000985,-0.00000341,0.00000885,0.00000278,-0.00001174,-0.00

000646,0.00000008,-0.00000441,0.00000989,-0.00000948,0.00001170,0.0000

0624,0.00000607,0.00000744,-0.00001092,0.00000189,-0.00000820,0.000007

82,-0.00000303,-0.00000402,-0.00001211,0.00000462,0.00000866,-0.000004

56,-0.00000619,-0.00000295,0.00000896,0.00000193,0.00000140,0.00000023

,0.00000683,-0.00000528,-0.00000200,0.00000177,0.00000021,0.00000553||

|@

**H2NO4-*t*-Bu – CBS-QB3**

Temperature= 298.150000 Pressure= 1.000000

E(ZPE)= 0.158943 E(Thermal)= 0.170848

E(SCF)= -511.561879 DE(MP2)= -1.903850

DE(CBS)= -0.184240 DE(MP34)= -0.064014

DE(CCSD)= -0.064001 DE(Int)= 0.058497

DE(Empirical)= -0.087701

CBS-QB3 (0 K)= -513.648244 CBS-QB3 Energy= -513.636339

CBS-QB3 Enthalpy= -513.635395 CBS-QB3 Free Energy= -513.686425

1\1\GINC-LAB6-39\Mixed\CBS-QB3\CBS-QB3\C4H11N1O4\CURS05\19-Sep-2000\0\

\# CBS-QB3 GEOM=CONNECTIVITY\\H2NO4Bu\\0,1\N,1.696751334,1.3274532079,

2.0992122034\H,0.693392476,1.225875424,2.2392971239\H,2.0354004189,2.2

783552132,2.2330472959\O,2.1256330469,0.7589242382,1.0026024736\O,1.38

66356422,1.5310157668,-0.3293600398\O,0.6754475897,0.6513004527,-0.966

3986143\O,-0.6471080352,0.4963081807,-0.2122695199\C,-1.1246370563,-0.

8522257639,-0.4211640688\C,-2.4620336007,-0.8252390508,0.3307510908\H,

-2.9476330295,-1.8008587472,0.2486273436\H,-2.307327642,-0.6048571395,

1.3892250749\H,-3.1256629783,-0.0676293234,-0.0903497644\C,-1.34715272

51,-1.1075389799,-1.9170170069\H,-1.8136358012,-2.0843829397,-2.070311

6809\H,-1.9996397474,-0.3391693156,-2.3375957249\H,-0.401898898,-1.093

1757446,-2.4618356623\C,-0.1612678548,-1.8701780869,0.1970674406\H,-0.

0257665823,-1.6704247356,1.2623612993\H,-0.5547850079,-2.8837956192,0.

0822012575\H,0.8159789253,-1.8214073469,-0.2835711169\\Version=HP-PARi

sc-HPUX-G98RevA.9\HF/CbsB3=-511.5618794\E2(CBS)/CbsB3=-2.0880891\CBS-I

nt/CbsB3=0.0584966\OIii/CbsB3=15.1468985\MP2/CbsB4=-513.0003617\MP4(SD

Q)/CbsB4=-513.0643757\MP4(SDQ)/6-31+G(d')=-512.9715856\QCISD(T)/6-31+G

(d')=-513.0355864\CBSQB3=-513.6482441\FreqCoord=3.206395092,2.50852282

57,3.9669358563,1.3103217822,2.3165686476,4.2316579712,3.8463490687,4.

3054670576,4.2198475087,4.016864011,1.4341588562,1.8946439506,2.620361

4097,2.8932002835,-0.6224002268,1.2764108643,1.2307793919,-1.826228576

8,-1.2228568715,0.9378864675,-0.4011312284,-2.125255873,-1.6104731742,

-0.7958846863,-4.65256888,-1.5594756811,0.625028932,-5.5702187407,-3.4

031295763,0.4698375527,-4.3602170092,-1.1430142558,2.625254728,-5.9066

465615,-0.1278008899,-0.1707362979,-2.5457495152,-2.0929451936,-3.6226

368584,-3.4272747074,-3.9389126113,-3.9123217879,-3.7787711985,-0.6409

370702,-4.4174153921,-0.7594787923,-2.0658026147,-4.6521948307,-0.3047

520563,-3.5341241341,0.372403464,-0.0486917803,-3.1566450348,2.3855169

543,-1.0483916474,-5.4495835274,0.1553378526,1.5419765812,-3.441960799

3,-0.5358717093\PG=C01 [X(C4H11N1O4)]\NImag=0\\0.62408331,0.14818029,0

.55244435,-0.12682341,0.16772850,0.31457578,-0.40214490,-0.06711194,0.

04854458,0.41771978,-0.04029594,-0.06263078,-0.02493635,0.05009094,0.0

5809786,0.01309910,-0.01448837,-0.02858873,-0.05846349,0.01971745,0.05

292856,-0.10631660,-0.11442871,0.01454114,-0.00725206,-0.03360185,-0.0

0465018,0.10067746,-0.14210718,-0.35605802,-0.04933991,0.00528149,-0.0

0113791,0.00494968,0.12898137,0.37262760,0.01317345,-0.01462360,-0.028

36150,-0.00320215,0.00646514,0.00063590,-0.00716696,0.05769684,0.05294

053,-0.12899504,0.04245232,0.07840770,-0.01005035,0.02883594,0.0440748

9,0.01416261,0.00521433,-0.00168180,0.16835703,0.04773395,-0.15493239,

-0.10167491,0.00990662,0.00825389,-0.01302945,0.02487931,-0.01953547,-

0.04331232,-0.10001333,0.23736029,0.10434335,-0.13813611,-0.18798210,0

.01626389,0.00084775,-0.03127960,-0.00576656,-0.01605038,-0.03097990,-

0.11108475,0.15685971,0.25373712,0.01345274,-0.00869106,-0.00349269,0.

00093673,-0.00264724,0.00320944,-0.00067863,0.00136944,0.00011066,-0.0

2845464,0.01994104,0.00943090,0.15965315,-0.01690281,0.02643459,0.0147

5460,0.00175136,-0.00055320,0.00303327,-0.00710344,0.00524189,-0.00715

606,0.04023479,-0.10775894,0.00543544,0.10800887,0.28117348,-0.0020551

1,-0.00093373,-0.05381626,-0.00433752,0.00033045,0.00305294,0.00448667

,0.00032122,0.00797262,0.01001635,0.01629043,0.01238943,0.04428462,0.0

6608150,0.12467999,-0.00068049,0.00052066,-0.00450425,0.00181961,-0.00

048347,0.00213333,-0.00188826,0.00138091,-0.00225060,-0.01326085,-0.00

590255,-0.02181170,-0.08644904,-0.07401149,-0.02799692,0.14902879,0.00

437764,-0.00560334,-0.00166763,0.00076571,-0.00135722,-0.00007032,0.00

079618,-0.00104191,0.00030487,-0.02527508,0.03971679,-0.01213311,-0.06

296050,-0.19350640,-0.10114542,0.06454025,0.21846550,-0.00151734,0.000

49001,-0.02438956,0.00000759,-0.00403648,0.00175672,-0.00020596,0.0022

9853,-0.00151070,-0.01661043,-0.01514111,-0.01213297,-0.04806101,-0.09

556294,-0.12428007,0.01178566,0.14951901,0.25023555,0.00054041,-0.0007

8389,-0.00556308,-0.00083904,-0.00160423,0.00112099,0.00116606,-0.0000

6098,0.00085903,-0.00315671,0.00435182,0.00647000,-0.04288219,-0.04508

632,-0.02632394,-0.04146983,0.05199244,0.06644537,0.17808456,-0.000474

83,0.00001718,-0.00800365,-0.00061885,-0.00108920,0.00088454,0.0008512

3,-0.00012012,0.00089862,0.00818604,-0.00158034,0.00569388,-0.05836955

,-0.01262363,0.01685717,0.03808415,-0.04657564,-0.04654185,0.03349450,

0.29448110,-0.00001228,-0.00020880,0.00744987,0.00110237,0.00177139,0.

00105190,-0.00101604,0.00001249,-0.00053447,-0.00289345,0.00070041,-0.

00314696,-0.01120699,0.01082729,0.03202600,0.04429331,-0.05310710,-0.0

9556935,-0.04702944,0.08147961,0.13746975,0.00007863,-0.00019159,-0.00

026204,-0.00010321,-0.00025387,-0.00074836,-0.00006613,0.00004796,-0.0

0001266,0.00191335,-0.00025153,0.00154809,-0.01398413,-0.00559128,0.00

186085,-0.01483513,-0.02982770,-0.00456357,-0.06441772,0.01716833,0.01

169562,0.48253190,-0.00071445,0.00077263,0.00815658,-0.00008320,0.0015

6796,-0.00200930,-0.00108351,0.00010388,-0.00083339,0.00142043,-0.0024

0604,-0.00645208,0.00922206,0.00571199,0.00480285,-0.02964467,-0.00571

724,0.01065539,-0.00460309,-0.15358757,-0.03291793,-0.04388809,0.42594

022,-0.00023015,0.00011175,0.00209140,0.00003448,-0.00000699,0.0001664

6,-0.00035627,0.00016410,-0.00027531,-0.00008925,-0.00043407,-0.001258

55,0.00660591,0.00316960,-0.00086584,0.00202131,0.01684258,0.00308631,

-0.00065425,-0.04164560,-0.07859254,-0.01109552,0.00111042,0.49637462,

0.00001319,0.00000682,0.00001389,-0.00001876,-0.00000426,-0.00006040,0

.00001047,-0.00001956,0.00000885,0.00012611,-0.00003852,0.00011891,-0.

00123592,-0.00069328,-0.00009827,0.00438942,-0.00048754,-0.00288514,-0

.02903430,-0.01715137,0.01167579,-0.14306698,0.00992456,0.04017437,0.4

8193066,0.00022073,-0.00024301,-0.00277199,-0.00002718,-0.00056719,0.0

0031171,0.00039778,-0.00007859,0.00030257,-0.00009885,0.00066884,0.002

53073,-0.00558919,-0.00316062,-0.00096443,-0.00052306,-0.00448041,-0.0

0040198,-0.03480049,-0.00550066,0.01850512,0.00920403,-0.07164135,-0.0

0339723,0.00037016,0.57562664,-0.00004789,-0.00008469,-0.00100597,-0.0

0021216,-0.00041332,0.00016281,0.00023195,-0.00007020,0.00007473,-0.00

014722,0.00031642,0.00098493,-0.00132483,-0.00072478,-0.00029081,-0.00

272583,-0.00144195,0.00095720,0.00443634,0.00684482,0.00199822,0.04055

224,-0.00326455,-0.09989126,0.05421587,-0.00310110,0.54808708,0.000069

51,-0.00007495,-0.00094510,-0.00001385,-0.00016589,0.00012733,0.000133

30,-0.00002524,0.00010803,-0.00001312,0.00019871,0.00082670,-0.0015332

4,-0.00092773,-0.00035382,0.00082317,-0.00088129,-0.00005396,-0.005315

19,0.00171485,0.00371495,-0.01188939,-0.02615853,-0.00379881,-0.095392

08,-0.10236908,-0.00907658,0.10371367,0.00004732,-0.00001548,-0.000226

70,0.00002534,-0.00004027,0.00005945,0.00003777,-0.00000044,0.00003776

,-0.00008360,0.00005025,0.00023229,-0.00015476,-0.00028324,-0.00042372

,0.00142231,0.00110859,-0.00045691,-0.00171407,-0.00018093,0.00113040,

0.00175564,-0.00054257,-0.00050337,-0.10411427,-0.25716031,-0.01858111

,0.11353257,0.27889618,-0.00000175,0.00005597,0.00037839,0.00007054,0.

00012825,-0.00004159,-0.00007918,0.00001526,-0.00002769,0.00005307,-0.

00014732,-0.00042668,0.00101725,0.00053340,0.00004605,0.00024461,0.000

63207,0.00101904,0.00221673,-0.00088531,-0.00235577,0.00612057,0.01490

571,0.00020540,-0.00975932,-0.01958128,-0.04682620,0.00820154,0.021450

30,0.04817762,-0.00005255,-0.00000102,0.00014397,-0.00011277,-0.000130

80,-0.00008359,0.00000607,-0.00000108,-0.00003533,0.00003297,0.0000388

6,-0.00007869,0.00022504,0.00015658,0.00015191,-0.00008397,0.00003506,

-0.00052913,0.00131945,0.00093659,-0.00006404,0.00446104,0.00626553,0.

02848381,-0.05396036,-0.00768397,-0.04163683,-0.00267283,-0.00161969,-

0.01376082,0.05723565,-0.00004742,-0.00000254,0.00021944,-0.00013417,0

.00005854,-0.00010220,-0.00002838,-0.00000309,-0.00002200,0.00004807,-

0.00005703,-0.00013703,0.00005276,0.00004392,0.00005689,0.00007623,-0.

00017649,-0.00017498,-0.00033528,0.00048007,0.00107699,-0.00066054,-0.

00217140,-0.00013980,-0.00677754,-0.05765013,-0.05140397,-0.00352774,-

0.00479970,-0.02846569,0.00817098,0.05793447,0.00004682,0.00003009,0.0

0010606,0.00009627,0.00011489,0.00001823,-0.00003771,0.00001519,0.0000

1612,0.00000855,-0.00010099,-0.00015034,0.00000228,-0.00012885,-0.0001

8604,0.00032188,0.00048078,0.00079252,-0.00112384,-0.00066257,0.000723

51,-0.00315195,-0.00321265,-0.01701671,-0.03910973,-0.05124409,-0.2925

1037,-0.00035978,-0.00016643,-0.00096524,0.04172266,0.05707483,0.31903

701,-0.00003922,0.00002902,0.00035082,-0.00000911,0.00013420,-0.000058

65,-0.00005352,-0.00000354,-0.00003585,0.00008592,-0.00016116,-0.00028

887,0.00021746,0.00025273,0.00019790,0.00004975,-0.00064832,0.00018233

,0.00151288,0.00115296,-0.00066621,-0.01851073,0.02055267,-0.01227142,

-0.14104392,0.10971635,-0.06164280,0.00987247,-0.01007714,0.00660086,-

0.00294029,0.00258269,-0.00166032,0.15447014,-0.00000565,0.00000423,0.

00011773,-0.00000130,0.00001432,-0.00003375,-0.00002647,0.00001091,-0.

00001869,0.00004395,-0.00000395,-0.00008452,0.00007545,0.00003505,0.00

000714,0.00011201,0.00010472,-0.00018511,-0.00133890,0.00063456,0.0001

1911,-0.00025510,-0.00172562,0.00005478,0.11182639,-0.17530662,0.07222

154,0.01771795,-0.01836403,0.01131751,-0.00544321,0.00558269,-0.002704

15,-0.12250710,0.18761067,0.00002133,-0.00001858,-0.00005148,0.0000077

0,0.00008248,-0.00001150,-0.00001446,0.00000041,0.00001270,-0.00000826

,-0.00000984,0.00003455,-0.00018235,-0.00008183,-0.00001833,-0.0000204

5,-0.00020513,-0.00008690,-0.00065217,-0.00019922,0.00037383,0.0092882

6,-0.01244537,0.00574048,-0.06347220,0.07342156,-0.09004738,0.00263656

,-0.00258060,0.00047325,-0.01809236,0.02246084,-0.01086199,0.06666933,

-0.07991181,0.09401617,-0.00003083,0.00007073,0.00041156,-0.00000696,0

.00010192,0.00012530,-0.00002449,-0.00000688,-0.00000241,-0.00009107,-

0.00006399,-0.00026551,-0.00031905,-0.00013399,0.00050306,0.00194212,0

.00040231,-0.00304473,-0.00476413,-0.01482355,-0.01548133,-0.08035635,

0.00412695,-0.00907182,0.00270845,0.00594192,0.03069564,0.00091995,0.0

0020779,-0.00024492,-0.00510183,0.00042518,0.00425268,0.00090558,-0.00

023621,0.00043514,0.57590901,0.00006233,-0.00009198,-0.00127325,0.0000

5955,-0.00030683,0.00050572,0.00015973,0.00000387,0.00012460,-0.000126

83,0.00029649,0.00094617,0.00025359,0.00006437,-0.00057845,0.00044480,

0.00064333,-0.00031662,-0.01312629,-0.02659687,-0.04045361,0.00139347,

-0.07279502,-0.00265674,0.00197067,0.00150558,-0.00104937,-0.00028472,

-0.00013337,0.00058965,-0.00046164,-0.00002404,0.00037821,-0.00004870,

-0.00013463,-0.00078918,-0.00623413,0.57564772,0.00001273,0.00001360,-

0.00011062,-0.00000946,0.00000140,-0.00001286,0.00000449,0.00000602,0.

00000667,0.00005619,-0.00014897,0.00005957,0.00066801,0.00027290,-0.00

080576,-0.00171120,-0.00094171,0.00049119,-0.00459912,-0.01126575,-0.0

0460386,-0.01117398,-0.00915881,-0.17265747,0.00399533,-0.00293147,-0.

02447380,-0.00097199,-0.00025688,0.00033294,0.00192814,0.00007273,-0.0

0038120,-0.00173158,0.00021339,0.00116205,-0.02143839,-0.02124152,0.46

464581,0.00002852,-0.00002889,-0.00036444,0.00001600,-0.00006753,0.000

07257,0.00005030,-0.00001201,0.00003682,-0.00007587,0.00008645,0.00028

607,0.00013522,0.00004838,-0.00014940,0.00000092,-0.00014037,-0.000074

05,0.00049870,-0.00009886,-0.00062733,-0.00346360,-0.00369459,0.000979

99,-0.00005089,0.00034207,0.00050374,0.00035057,0.00016412,0.00025350,

-0.00005627,0.00008100,-0.00014658,0.00003036,0.00012893,0.00000639,-0

.09423794,-0.09985518,-0.01580305,0.09836986,0.00002854,-0.00002891,-0

.00044586,0.00001285,-0.00006794,0.00012680,0.00006672,-0.00001941,0.0

0005100,-0.00011264,0.00010521,0.00032104,-0.00003485,0.00004584,-0.00

000547,0.00094753,0.00020819,-0.00018172,-0.00129329,0.00055816,-0.002

31911,-0.00123568,-0.00581150,0.00160929,-0.00025515,-0.00008905,0.000

70840,0.00042127,0.00056063,-0.00039034,0.00017872,0.00026669,0.000016

60,-0.00009797,-0.00004673,-0.00007475,-0.09988952,-0.25536015,-0.0313

5191,0.11067163,0.27711067,0.00000576,-0.00001277,-0.00031110,0.000025

23,-0.00006160,0.00016929,0.00004569,-0.00000648,0.00003995,-0.0000408

1,0.00010277,0.00024242,-0.00025606,-0.00020784,-0.00000334,0.00177396

,0.00095860,0.00016319,-0.00295225,-0.00536442,-0.00813954,-0.01240025

,-0.02710183,0.00012080,-0.00046304,-0.00037797,0.00152518,0.00060824,

0.00018617,-0.00044427,-0.00013176,0.00030551,0.00029972,0.00009430,0.

00002133,-0.00008658,-0.01492793,-0.02907106,-0.05243038,0.01632387,0.

03414600,0.05515954,-0.00000639,0.00001856,0.00023150,-0.00000605,0.00

006457,-0.00003721,-0.00002607,-0.00000233,-0.00002193,0.00001990,-0.0

0005402,-0.00014576,-0.00001566,-0.00029007,-0.00005606,-0.00056877,0.

00006905,0.00002859,0.00057403,-0.00022479,0.00071484,-0.00439003,0.00

352317,-0.00194345,0.00035526,-0.00048112,0.00077572,0.00001172,-0.000

10953,0.00006334,-0.00001292,-0.00012739,-0.00007278,0.00053753,0.0000

0960,0.00011599,-0.14190109,0.11181940,-0.05864195,0.00945985,-0.01026

341,0.00661267,0.15049312,-0.00001027,0.00000920,0.00011944,0.00000884

,0.00000502,-0.00003581,-0.00002262,0.00000629,-0.00001503,0.00004542,

-0.00001137,-0.00008330,-0.00005148,-0.00005166,0.00003783,-0.00010856

,0.00001059,-0.00006155,-0.00002462,0.00175497,0.00027329,-0.00379831,

0.00211831,-0.00307728,-0.00018490,-0.00000730,-0.00009592,0.00013278,

-0.00003464,0.00006296,-0.00021689,0.00014004,-0.00003569,-0.00028089,

0.00041078,0.00019676,0.11248356,-0.17942358,0.07113955,0.01753943,-0.

01852599,0.01050293,-0.12359390,0.19159828,-0.00001991,0.00003381,0.00

027240,-0.00001780,0.00009950,-0.00006458,-0.00003528,-0.00000241,-0.0

0001789,0.00003197,-0.00013080,-0.00020587,-0.00006864,-0.00001138,0.0

0008351,-0.00033431,-0.00014566,-0.00018709,0.00176680,0.00048985,0.00

322499,-0.02007137,0.02532651,-0.01372957,-0.00130022,0.00085855,0.001

32018,0.00004201,-0.00003137,-0.00007494,0.00009499,-0.00028442,0.0003

8357,0.00093222,-0.00052014,-0.00030210,-0.05747336,0.06807751,-0.0834

8581,0.00389046,-0.00333719,0.00118571,0.06496377,-0.07656566,0.091998

43,-0.00000883,-0.00000704,-0.00012763,-0.00000898,-0.00002358,-0.0000

0379,0.00000532,0.00000452,0.00000725,0.00005707,-0.00007069,0.0000967

9,0.00008882,-0.00001862,-0.00053221,-0.00106815,-0.00127475,-0.000709

78,0.00026666,0.00050140,0.00113261,0.00524784,0.00054970,-0.00370494,

0.00056926,-0.00002940,-0.00077449,0.00009008,0.00012807,-0.00022460,0

.00038644,-0.00011840,-0.00014683,0.00013138,-0.00020738,-0.00017760,-

0.25030922,-0.00283839,0.11458775,-0.01106867,0.00038925,0.00554557,-0

.01566604,-0.00136068,0.00870503,0.27013891,-0.00004460,0.00004556,0.0

0044667,-0.00000516,0.00009317,-0.00007094,-0.00005910,0.00001056,-0.0

0004328,0.00016683,-0.00013166,-0.00031902,-0.00041827,-0.00045388,-0.

00013244,-0.00032846,-0.00030455,-0.00052453,0.00041406,0.00041189,0.0

0054310,0.00546221,-0.00139655,-0.00330088,-0.00039092,-0.00016786,-0.

00105176,0.00027518,0.00028251,-0.00010754,0.00022491,0.00055215,-0.00

037316,-0.00038293,0.00016093,0.00011996,-0.00372440,-0.04701489,0.003

34904,-0.02555974,0.00045803,0.01506954,0.02015681,0.00089966,-0.01233

638,0.00457488,0.04662776,-0.00000988,0.00005362,0.00020712,0.00000650

,0.00005321,-0.00004743,-0.00004514,0.00001713,-0.00001592,0.00014862,

-0.00011765,-0.00019768,-0.00069371,-0.00023346,-0.00008101,-0.0000526

0,-0.00030136,0.00044724,0.00019326,0.00157617,0.00167573,0.02966362,0

.00144504,-0.01588358,-0.00244385,-0.00163823,-0.00604877,-0.00030991,

0.00014585,0.00022636,0.00178673,-0.00017446,-0.00106654,-0.00005165,-

0.00014095,0.00010259,0.11166726,0.00207615,-0.11053819,-0.00482695,0.

00066782,0.00208919,-0.01129721,-0.00119000,0.00637642,-0.12370942,-0.

00193149,0.12109498,-0.00004681,0.00027540,-0.00017504,-0.00001298,0.0

0004953,0.00010279,0.00000284,0.00004499,0.00007979,0.00012929,-0.0006

0614,0.00005171,-0.00050185,-0.00064607,0.00006444,0.00265390,0.001961

14,-0.00052969,0.00874503,-0.01473200,0.00472535,-0.12409791,0.0448073

3,-0.02706871,-0.02642405,0.02288541,-0.01034011,0.00100394,0.00036118

,-0.00061282,0.00171745,-0.00022854,-0.00121179,-0.00469088,0.00028984

,0.00247219,-0.00347671,0.00434725,-0.00546876,-0.00009782,0.00022381,

0.00020645,0.00054832,-0.00062622,0.00006964,0.00068346,-0.00039656,0.

00119082,0.53791546,0.00000698,-0.00012813,-0.00084336,0.00007113,-0.0

0009786,0.00021882,0.00020513,-0.00007891,0.00011592,-0.00089033,-0.00

005609,0.00037574,0.00071522,0.00044866,-0.00033154,0.00236770,-0.0011

0868,0.00056160,0.01279768,-0.04939379,0.01059263,0.03800950,-0.104691

30,0.02504856,0.00600049,0.00079310,-0.00107766,-0.00053627,-0.0000812

9,0.00003709,-0.00045614,-0.00023930,0.00053616,-0.00155060,0.00056725

,0.00031165,0.00006322,0.00627049,0.00260196,-0.00012767,-0.00039017,0

.00022551,-0.00101901,0.00039257,-0.00259786,-0.00004254,-0.00022133,-

0.00046710,0.04951559,0.52076478,0.00002810,-0.00031710,-0.00117641,0.

00000444,-0.00093858,0.00007403,0.00029087,-0.00007322,-0.00006996,-0.

00024456,0.00072452,0.00084943,0.00022447,0.00027046,0.00006345,-0.000

80882,0.00051889,-0.00050027,0.00437701,-0.00240767,0.00494573,-0.0290

6232,0.02690172,-0.09902231,0.00918244,-0.01031013,0.00634489,-0.00062

306,-0.00009708,0.00016631,0.00092864,-0.00066398,0.00047103,0.0037861

2,-0.00093101,-0.00140364,-0.02366563,0.02224470,-0.01872754,0.0000908

9,0.00040965,0.00079109,-0.00127653,-0.00078768,-0.00615183,-0.0001726

6,0.00045460,0.00149162,-0.03061432,0.03401236,0.56061968,0.00007976,-

0.00020710,-0.00061499,0.00012152,-0.00008662,0.00007374,0.00001344,0.

00000995,0.00004038,-0.00015598,0.00043244,0.00028061,0.00030352,0.000

12024,0.00018377,-0.00031554,-0.00025849,-0.00004835,0.00087374,-0.001

30351,0.00151759,-0.00411375,-0.00550404,-0.02125987,0.00093603,-0.000

79360,-0.00120154,-0.00010640,0.00000408,-0.00005718,-0.00045368,0.000

52805,0.00047208,0.00025596,-0.00008409,0.00030662,-0.00250621,0.00333

966,-0.00084478,0.00005559,0.00005182,0.00034017,0.00014618,0.00003546

,-0.00145575,0.00016348,0.00008868,-0.00019336,-0.05066152,-0.00481242

,-0.02829584,0.05270994,-0.00015208,-0.00010403,-0.00012990,-0.0000025

3,-0.00030034,-0.00003643,0.00001970,0.00002443,-0.00005163,0.00000820

,0.00007868,0.00003599,0.00006362,-0.00003592,0.00014456,-0.00025164,-

0.00019011,-0.00003351,-0.00046905,0.00249922,-0.00075499,0.00301219,0

.00301328,0.02294617,-0.00094804,0.00045637,0.00040779,0.00000707,-0.0

0000517,-0.00016793,0.00017928,0.00011199,-0.00029425,-0.00021425,-0.0

0001322,0.00002848,0.00260206,-0.00304506,0.00117523,0.00025444,0.0002

5238,0.00009827,0.00044983,0.00045774,0.00128476,-0.00001930,-0.000114

26,-0.00020968,-0.00614543,-0.05700669,-0.05099415,0.00369819,0.058741

80,-0.00011058,0.00021151,0.00075049,0.00003681,0.00042557,0.00002789,

-0.00007720,-0.00002916,-0.00000771,-0.00011904,-0.00071757,-0.0004936

0,-0.00029212,-0.00013383,-0.00021858,0.00023392,0.00045861,0.00001421

,0.00109747,-0.00004028,0.00188534,-0.00146308,-0.00417306,-0.01496833

,0.00116754,-0.00050010,0.00045703,0.00005042,0.00010084,-0.00002060,-

0.00056682,0.00019253,0.00092121,0.00009227,0.00012905,0.00032877,-0.0

0210371,0.00294625,0.00047684,0.00011275,-0.00013105,0.00024013,-0.000

35984,-0.00010373,-0.00089298,0.00006821,-0.00010817,0.00038392,-0.029

61908,-0.04870154,-0.29656370,0.03396584,0.05368158,0.32254377,-0.0000

4686,0.00001792,0.00032366,-0.00001113,0.00009672,-0.00004341,0.000032

64,-0.00005574,-0.00003607,-0.00023599,-0.00033860,-0.00018615,0.00021

248,0.00036103,-0.00006304,-0.00040179,-0.00134283,0.00038969,-0.00176

082,0.00674152,-0.00151314,0.00783495,0.01675301,0.00361690,0.00064707

,-0.00009324,0.00033186,-0.00048282,0.00025979,0.00002437,-0.00007575,

0.00004570,0.00003166,0.00024891,-0.00022828,-0.00005603,0.00025188,-0

.00047615,0.00009452,0.00007872,0.00010801,-0.00044013,0.00005126,-0.0

0001992,0.00033260,-0.00004570,-0.00011830,-0.00005424,-0.08209395,-0.

08913835,-0.01114837,-0.00219606,-0.00237836,0.00005880,0.08684896,0.0

0003814,-0.00001634,-0.00049341,0.00001177,-0.00003707,0.00015854,0.00

008772,-0.00002889,0.00006522,-0.00016981,0.00008126,0.00037782,-0.000

15008,-0.00009676,-0.00018113,0.00134097,0.00096158,-0.00087403,0.0026

0584,-0.00554459,0.00302763,-0.01121279,-0.01760446,-0.00480815,-0.001

21176,0.00040546,-0.00025351,0.00084671,0.00047748,-0.00009900,0.00005

754,-0.00002689,0.00010386,0.00009762,0.00033732,0.00011878,-0.0006206

7,0.00032790,-0.00058862,0.00042734,0.00078455,0.00056029,0.00017470,0

.00033717,-0.00007352,0.00004811,-0.00004660,-0.00002716,-0.08715155,-

0.26898475,-0.02512156,-0.00157377,-0.00451561,-0.00049304,0.09664947,

0.29358279,-0.00003880,0.00013860,0.00046103,0.00000559,0.00030438,-0.

00001319,-0.00007296,-0.00000129,0.00001622,-0.00002690,-0.00040308,-0

.00035768,-0.00014253,-0.00008953,-0.00004439,-0.00042854,0.00014753,0

.00036446,-0.00078494,0.00369332,0.00001440,0.00661321,0.01023731,0.00

047912,0.00038781,-0.00032942,0.00001101,0.00010229,-0.00007903,0.0003

3257,-0.00006679,-0.00014913,0.00004689,0.00008199,0.00003370,-0.00013

997,0.00008738,-0.00011885,-0.00004426,-0.00050467,0.00017649,-0.00056

711,0.00012223,-0.00021032,0.00017226,0.00007045,0.00011529,-0.0000484

3,-0.01123927,-0.02667250,-0.05025117,-0.01144363,-0.02948427,-0.00152

802,0.01307256,0.02837405,0.04983119,0.00002244,-0.00004556,-0.0000961

6,-0.00002351,-0.00000853,0.00000962,0.00004526,-0.00004036,0.00002149

,-0.00039464,-0.00006867,-0.00008902,0.00082919,0.00047113,0.00021671,

0.00031413,-0.00184292,-0.00000610,0.00005841,-0.00103424,-0.00006218,

-0.01877265,-0.00177123,0.00962767,-0.00145871,0.00341071,-0.00261310,

0.00043057,-0.00007288,-0.00012579,0.00013912,-0.00002528,0.00006642,-

0.00103065,0.00012956,0.00071637,0.00048884,-0.00039841,0.00104710,-0.

00002354,0.00008236,0.00003032,0.00039584,0.00005375,-0.00005283,0.000

34689,0.00006487,-0.00096887,-0.26129521,-0.01117930,0.10699913,0.0048

4997,0.00028611,-0.00217258,-0.00885599,-0.00029548,0.00420553,0.28393

424,0.00005933,0.00012724,0.00026396,-0.00000125,0.00009504,-0.0000894

1,-0.00012855,0.00007331,0.00001347,0.00011415,-0.00013843,-0.00026103

,-0.00063507,-0.00067554,-0.00023372,0.00001638,-0.00115729,0.00096878

,-0.00041583,0.00195619,-0.00029792,0.02111314,0.00086236,-0.01108712,

0.00217800,-0.00340295,0.00211490,0.00010437,0.00026584,0.00011624,-0.

00022962,-0.00001994,0.00017222,0.00145437,0.00012135,-0.00042461,-0.0

0069229,0.00016664,-0.00096018,-0.00015895,-0.00001047,0.00002702,-0.0

0012012,-0.00008606,-0.00013370,-0.00018519,0.00030938,0.00039656,-0.0

1422900,-0.04675863,0.00710522,0.00631509,-0.00030546,-0.00301441,-0.0

2684337,-0.00039352,0.01431675,0.01228441,0.04897096,0.00013644,-0.000

04370,-0.00049880,0.00003660,0.00005148,0.00001477,-0.00007693,0.00007

619,0.00008562,0.00014916,0.00037380,0.00031447,0.00016738,-0.00004793

,0.00029643,-0.00016275,0.00129642,-0.00067074,0.00070004,-0.00140168,

0.00010322,-0.01333736,-0.00197258,0.00589685,-0.00134868,0.00161922,-

0.00082869,0.00007494,0.00006012,-0.00017497,-0.00019469,0.00025789,0.

00032255,-0.00058078,0.00029481,0.00076550,-0.00045833,-0.00034030,0.0

0109670,-0.00006060,0.00000432,-0.00004385,0.00022409,-0.00007083,0.00

009520,0.00007032,0.00020138,-0.00016762,0.10791642,0.00605356,-0.1019

5043,0.02823448,0.00235391,-0.01333606,-0.00473603,0.00022692,0.001265

07,-0.11675373,-0.00899301,0.10741479\\0.00001028,0.00000199,0.0000019

0,-0.00000346,0.00000288,-0.00001197,-0.00000102,0.00001051,-0.0000108

8,0.00000209,-0.00000782,0.00000710,-0.00000248,0.00002716,-0.00000525

,-0.00001450,-0.00001675,-0.00001018,0.00000697,0.00000893,0.00000358,

-0.00000516,-0.00000711,0.00000300,0.00000444,-0.00000365,-0.00000130,

0.00000273,-0.00000175,0.00000751,0.00000071,0.00000121,0.00000282,-0.

00000081,-0.00000440,0.00000207,-0.00000044,-0.00000446,-0.00000176,-0

.00000312,-0.00000296,0.00000356,-0.00000246,-0.00000414,0.00000271,-0

.00000408,-0.00000487,0.00000161,0.00000402,0.00000158,0.00000284,0.00

000039,0.00000050,0.00000086,0.00000422,0.00000076,0.00000084,0.000001

69,0.00000236,0.00000093\\\@

**t-BuO. – CBS-QB3**

Temperature= 298.150000 Pressure= 1.000000

E(ZPE)= 0.120390 E(Thermal)= 0.127017

E(SCF)= -231.614792 DE(MP2)= -0.878308

DE(CBS)= -0.088535 DE(MP34)= -0.065279

DE(CCSD)= -0.024519 DE(Int)= 0.029779

DE(Empirical)= -0.046265

CBS-Q (0 K)= -232.567529 CBS-Q Energy= -232.560902

CBS-Q Enthalpy= -232.559957 CBS-Q Free Energy= -232.597180

1|1|UNPC-UNK|Mixed|CBS-QB3|CBS-QB3|C4H9O1(2)|PCUSER|19-Dec-1999|0||#N

CBS-QB3 TEST||TERBUTOSSILE dopo ottimizzazione||0,2|C,0.8934767983,-1.

175857789,-0.4211805008|C,0.0584475362,0.0566870657,-0.025176967|C,-0.

6728066777,-0.2065861345,1.3296040588|O,0.8748908851,1.1269718594,0.27

01244575|C,-0.9662032291,0.4335207296,-1.1121315515|H,1.4513825985,-0.

9689726566,-1.3377870372|H,1.6092785621,-1.4135546719,0.3681024886|H,0

.2562793737,-2.0469707867,-0.5978403277|H,-1.2458195753,0.6713833897,1

.6297992662|H,-1.3522050165,-1.0516107674,1.1928500602|H,0.0487220359,

-0.4474184548,2.1110766171|H,-1.5369672706,1.3108486083,-0.8017401723|

H,-0.4489976817,0.6742752883,-2.0442111491|H,-1.658286673,-0.390338055

1,-1.3079356431||Version=x86-Win32-G98RevA.7|HF/CbsB3=-231.6147924|E2(

CBS)/CbsB3=-0.9668426|CBS-Int/CbsB3=0.0297794|OIii/CbsB3=7.9741697|MP2

/CbsB4=-232.2933821|MP4(SDQ)/CbsB4=-232.3586614|MP4(SDQ)/6-31+G(d')=-2

32.2848258|QCISD(T)/6-31+G(d')=-232.3093452|CBSQB3=-232.5675292|FreqCo

ord=1.688426326,-2.2220490228,-0.7959157383,0.1104498281,0.1071230212,

-0.0475775689,-1.2714202642,-0.3903911872,2.5125873445,1.6533040428,2.

1296680112,0.5104612075,-1.8258593524,0.8192353892,-2.1016238955,2.742

7154157,-1.8310928113,-2.5280509313,3.0410955216,-2.6712309998,0.69561

28392,0.4842977928,-3.8682138936,-1.1297544042,-2.3542576285,1.2687306

398,3.0798740295,-2.5552969616,-1.9872561971,2.2541597593,0.0920712974

,-0.8454982818,3.9893563471,-2.9044469948,2.4771446823,-1.5150692396,-

0.8484825878,1.2741955357,-3.8629989346,-3.1337074226,-0.737631967,-2.

4716399762|PG=C01 [X(C4H9O1)]|NImag=0||0.52647878,0.05525258,0.4880825

9,0.02064948,-0.02487171,0.56586594,-0.09017205,0.05250502,0.01413165,

0.38092295,0.02837737,-0.11002877,-0.02487552,-0.00748977,0.41285009,0

.01149135,-0.01769707,-0.07821830,0.03751556,0.04728533,0.40955015,-0.

01579071,0.00001522,0.01820219,-0.05952204,0.00479145,0.03459246,0.532

20123,0.02090423,0.00284620,-0.02019005,-0.00896281,-0.05395416,0.0166

8778,-0.02182566,0.56461252,0.01000608,0.00087272,-0.01479847,0.002673

26,-0.02037633,-0.10484927,0.07389795,0.02629926,0.44073784,0.00121024

,-0.00462084,-0.00012314,-0.08467116,-0.07620021,-0.04525840,-0.029908

43,-0.01691686,0.02171461,0.13724151,-0.01564693,-0.05064433,-0.005511

76,-0.06738639,-0.13896501,-0.05956049,-0.02172152,-0.02035414,0.02782

828,0.12265826,0.21058570,-0.00667661,-0.01514834,-0.00140491,-0.02487

405,-0.03587588,-0.05209467,0.01061842,0.01487665,-0.00111346,0.040335

45,0.05306665,0.06108928,-0.01574714,0.01133945,-0.01392471,-0.0934282

7,0.02957936,-0.03863764,0.00653292,-0.00170636,0.01074905,-0.03443525

,-0.01725273,-0.02415831,0.51310743,0.03026481,-0.00624127,0.02363806,

0.00714202,-0.06925022,0.00762990,0.01056549,-0.00345268,0.01145325,-0

.02063787,-0.00873312,-0.01743193,0.01964081,0.55976330,0.00404741,0.0

0099238,0.00630585,-0.03747128,0.01916854,-0.11552280,-0.01739412,0.00

937282,-0.03084051,-0.01294045,-0.00645325,-0.00774645,-0.06033867,0.0

2775913,0.50751514,-0.11405189,-0.02671638,0.11135169,-0.00940647,-0.0

0232687,0.01371737,-0.00164034,0.00290523,0.00105007,0.00009292,-0.001

99679,-0.00107439,0.00036893,-0.00142475,0.00076692,0.12182059,-0.0274

5800,-0.05701543,0.04544412,0.01204808,0.00236158,-0.02270838,0.002478

10,-0.00409364,-0.00171470,0.00149439,0.00345521,0.00110604,-0.0007540

1,0.00080812,-0.00070544,0.02712470,0.06093352,0.11117074,0.04467278,-

0.23197933,0.00269911,0.00059340,-0.00738618,0.00092492,-0.00199290,-0

.00026636,0.00009399,0.00080604,0.00095741,-0.00049122,0.00020909,0.00

034661,-0.12334185,-0.04836471,0.25015445,-0.15870009,0.03643681,-0.12

558143,-0.01386370,0.00232819,-0.01394239,0.00005417,-0.00034520,-0.00

143684,0.00170773,-0.00157584,0.00065531,-0.00136223,0.00351017,0.0023

8111,0.01212217,-0.00358677,0.01235638,0.17110198,0.03452311,-0.057274

71,0.03954223,0.01750490,-0.00642602,0.02015888,-0.00055044,0.00029781

,0.00100607,-0.00068745,0.00258483,0.00011170,0.00208447,-0.00476463,-

0.00255164,0.00434006,-0.00212254,0.00469442,-0.04188023,0.06019258,-0

.12691612,0.04121846,-0.18881986,0.00622714,-0.00182209,0.00503984,0.0

0056512,-0.00055218,0.00101806,0.00072893,0.00067119,0.00043475,0.0008

6492,-0.00124148,0.00028568,-0.01807052,0.00496311,-0.01865802,0.13764

794,-0.04339791,0.20266161,-0.13604676,-0.12160140,-0.02417543,0.00564

694,0.01632969,0.00250479,0.00166300,-0.00127920,-0.00040626,0.0027319

1,0.00264346,0.00163981,0.00008278,-0.00280612,-0.00035083,-0.00965645

,-0.01199487,-0.00356533,-0.01144565,-0.01626930,-0.00139816,0.1477983

0,-0.12315289,-0.21031113,-0.03334408,-0.01124510,-0.02032425,-0.00240

096,-0.00251280,0.00234651,0.00119519,-0.00111192,-0.00498496,-0.00293

795,-0.00123031,0.00381389,0.00012436,-0.00277347,-0.00466350,-0.00076

289,0.00459659,0.00693119,0.00067629,0.13397381,0.22694334,-0.02478490

,-0.03220022,-0.05343111,-0.00476990,-0.00600304,-0.00312373,-0.001013

65,0.00039534,0.00016550,0.00051708,-0.00309844,0.00020545,-0.00033282

,0.00103581,-0.00002429,0.01575158,0.02243503,0.00559611,-0.01251638,-

0.01946162,-0.00292928,0.02638359,0.03668361,0.05326374,-0.00084184,-0

.00099808,0.00266482,-0.01154131,0.00982423,0.00433662,-0.11904331,0.1

1367429,0.03489681,0.00177571,0.00171026,0.00018679,0.00049900,-0.0006

5868,-0.00128573,-0.00006370,0.00078000,0.00045663,0.00036890,-0.00025

258,-0.00001657,0.00002438,0.00034313,0.00001649,0.12678962,-0.0005821

5,0.00047510,0.00045003,-0.00354520,0.00402809,0.00122557,0.11491943,-

0.22435911,-0.05837410,-0.00063710,0.00097968,0.00108407,-0.00046057,0

.00001115,-0.00000390,-0.00003361,0.00038236,0.00008610,-0.00017611,0.

00000312,0.00008894,-0.00008487,0.00026274,0.00025787,-0.12469701,0.24

014532,0.00238175,0.00161741,-0.00455479,0.01510412,-0.02008591,-0.008

62427,0.03417927,-0.05719119,-0.06497069,-0.00207275,-0.00207829,0.000

33736,0.00049215,-0.00121682,0.00141937,0.00109898,-0.00127868,-0.0001

8801,0.00019875,0.00000459,0.00012505,-0.00020316,0.00019704,0.0001045

5,-0.04143872,0.06262028,0.07044724,0.00169583,0.00004012,-0.00035969,

-0.01402973,-0.01103672,-0.00148132,-0.14556224,-0.12689750,-0.0238732

3,0.00057612,-0.00070000,0.00304559,0.00070249,-0.00051991,-0.00111847

,0.00032268,0.00017367,-0.00014288,-0.00006820,-0.00011447,0.00003206,

-0.00027649,0.00108032,0.00061259,0.01189897,0.01350641,0.00223609,0.1

5658814,-0.00036428,0.00023506,-0.00101066,-0.00102211,-0.00688349,-0.

00138926,-0.12678941,-0.20353903,-0.02802150,-0.00217835,0.00057526,0.

00173720,0.00008852,0.00109284,-0.00049909,0.00017226,0.00012900,0.000

18610,0.00008221,0.00003207,0.00007986,0.00022510,0.00009221,-0.000151

95,-0.01629018,-0.01791483,-0.00295684,0.13989524,0.21913960,-0.000878

92,0.00015515,0.00131614,0.02175316,0.02549455,-0.00433303,-0.02362258

,-0.02772012,-0.04564143,-0.00035093,-0.00220202,-0.00183553,-0.000088

36,-0.00106923,0.00146313,-0.00046710,0.00023701,0.00020740,-0.0000081

2,-0.00009319,-0.00005806,0.00015761,-0.00054299,-0.00013958,-0.006012

51,-0.00574344,-0.00173804,0.02281792,0.03041312,0.05347593,0.00075383

,-0.00064117,0.00003428,0.00886880,-0.00399868,0.01072989,-0.16846374,

0.04119995,-0.12950747,0.00117259,0.00070467,0.00123925,-0.00084881,-0

.00067769,0.00225446,0.00009626,-0.00010841,-0.00007677,0.00009141,0.0

0008094,0.00005545,0.00000026,0.00006058,-0.00000867,-0.01034132,0.002

03593,-0.01127224,-0.01208027,0.00548408,-0.01271502,0.17996620,-0.000

70621,0.00003416,-0.00115657,0.00263657,-0.00461840,0.00457275,0.04036

809,-0.06037046,0.04010956,0.00071244,0.00112583,0.00048572,-0.0006331

5,0.00022139,0.00078289,0.00003996,-0.00016436,0.00006325,0.00015306,0

.00036688,-0.00015362,0.00004553,-0.00014374,-0.00017102,0.01694399,-0

.00462890,0.01932650,-0.01603372,0.00670046,-0.01864149,-0.04380742,0.

06062305,-0.00134699,0.00049731,0.00119446,-0.01565487,0.00791691,-0.0

2049897,-0.12784254,0.04001576,-0.17951279,-0.00196932,-0.00273470,0.0

0084376,0.00353292,0.00070695,-0.00427720,0.00016756,0.00006747,0.0004

8893,0.00104079,-0.00067140,0.00018739,0.00004621,0.00000716,-0.000055

13,0.00638776,-0.00148297,0.00785922,-0.00171688,0.00085121,-0.0023857

2,0.13836054,-0.04561747,0.19679651,-0.00282061,-0.00021170,-0.0042594

1,-0.01257754,0.01808303,0.00729812,0.00027736,-0.00036208,0.00097637,

0.00213408,-0.00052265,0.00106644,-0.11682908,0.10915349,0.04065719,0.

00034910,-0.00032313,-0.00011163,-0.00060757,0.00140665,0.00014701,0.0

0036722,0.00004275,0.00000140,0.00064869,-0.00013177,-0.00052416,0.000

02156,-0.00012728,-0.00001060,0.00001871,-0.00024933,0.00004180,0.1248

7307,0.00098969,0.00048932,0.00231545,0.00333121,-0.00875114,-0.003088

36,-0.00011977,-0.00023160,-0.00085330,-0.00104629,0.00166984,-0.00024

059,0.11101493,-0.21803869,-0.06255676,-0.00003273,0.00008575,-0.00012

734,0.00063754,-0.00028020,-0.00020108,-0.00023167,0.00044348,-0.00000

760,-0.00020431,0.00044237,0.00076071,0.00012633,-0.00005857,0.0000273

3,-0.00022585,0.00030686,0.00003904,-0.12241959,0.23452762,-0.00323922

,0.00044771,-0.00350637,-0.01180433,0.02006593,0.00604979,-0.00093174,

0.00081031,0.00132391,0.00184863,0.00022731,0.00094540,0.04182035,-0.0

6442314,-0.06994258,-0.00025874,-0.00004638,0.00010711,-0.00102971,0.0

0110208,0.00057803,0.00027422,-0.00018202,-0.00016193,0.00012893,-0.00

013939,-0.00045103,0.00007376,-0.00000380,-0.00005625,0.00013774,-0.00

018667,0.00017302,-0.04300897,0.06828339,0.07457646,0.00104294,-0.0006

0745,-0.00024992,0.00864157,0.00369297,-0.01945737,-0.00240045,0.00067

010,-0.00316993,0.00236728,0.00207027,0.00109011,-0.10865117,-0.027850

84,0.10908644,-0.00017817,0.00016263,0.00008690,0.00016443,-0.00024788

,0.00009246,-0.00005033,0.00003854,0.00009608,-0.00010345,-0.00015453,

-0.00015178,-0.00004379,0.00024382,0.00007362,0.00071979,0.00016406,-0

.00109572,-0.00828492,-0.00453431,0.01318214,0.11660591,-0.00124855,0.

00002303,0.00020243,-0.00312632,-0.00325007,0.00617001,0.00088662,-0.0

0020884,0.00109786,-0.00063306,0.00007070,-0.00082015,-0.02758869,-0.0

5954990,0.04879846,0.00064665,-0.00007103,-0.00000870,0.00001698,0.000

11463,-0.00028432,0.00005929,-0.00016951,0.00007733,-0.00011310,0.0001

5588,0.00027701,0.00033145,0.00020619,-0.00029076,-0.00021205,0.000483

00,0.00050860,0.01248119,0.00695322,-0.02272572,0.02945447,0.06034706,

0.00109897,-0.00062400,0.00047400,0.00906447,0.00311003,-0.01983588,-0

.00353462,0.00078836,-0.00338368,0.00177563,0.00159152,0.00207182,0.10

816694,0.04827776,-0.23485821,-0.00063303,0.00043103,0.00058653,-0.000

11123,-0.00026920,0.00026285,-0.00012146,0.00002893,0.00005197,-0.0001

5725,-0.00000398,0.00037034,-0.00004167,0.00000654,0.00049649,0.000563

22,0.00032175,-0.00107462,0.00396751,0.00206297,-0.00732246,-0.1167446

5,-0.05456957,0.25595822,0.00298944,-0.00019220,0.00163967,-0.01486801

,-0.01195400,-0.00340904,0.00160254,-0.00105813,0.00242954,-0.00199525

,-0.00298409,-0.00309380,-0.14999163,-0.12570097,-0.02829399,-0.000175

61,-0.00003637,-0.00005901,0.00043665,0.00006222,0.00004035,-0.0008391

1,0.00189076,0.00004752,-0.00007034,0.00004114,-0.00002831,0.00025495,

0.00058040,-0.00064815,0.00004630,0.00036612,0.00004874,0.01242993,0.0

1271483,0.00280693,-0.00982964,-0.01095489,-0.00329281,0.16000979,-0.0

0115283,-0.00066987,-0.00063200,0.00760991,0.00321177,0.00311432,-0.00

050477,0.00046059,-0.00052225,-0.00019516,0.00263452,-0.00001319,-0.12

412171,-0.19568023,-0.03422849,0.00007572,-0.00002504,-0.00005461,-0.0

0019741,0.00034499,-0.00004516,0.00099058,-0.00023625,0.00020889,-0.00

006195,0.00001705,0.00000420,0.00014877,0.00019323,-0.00002393,0.00010

511,0.00006424,-0.00010386,-0.01681959,-0.01755824,-0.00322961,-0.0031

0183,-0.00510437,-0.00115215,0.13722519,0.21234761,0.00299698,0.000067

46,0.00155670,-0.01459403,-0.01459591,-0.00615268,0.00135892,-0.001599

80,0.00213133,-0.00429933,-0.00255204,-0.00269023,-0.02765458,-0.03532

738,-0.05412377,-0.00005855,0.00013446,0.00003338,0.00034584,-0.000175

03,-0.00012803,-0.00078560,0.00125831,0.00047771,-0.00016407,-0.000065

07,-0.00013629,-0.00008388,0.00075905,-0.00077145,0.00020537,0.0002644

4,0.00026118,-0.00624105,-0.00641385,-0.00231312,0.01716161,0.02156753

,0.00620266,0.03181237,0.03667785,0.05565259||-0.00000526,0.00000926,-

0.00000336,0.00000444,-0.00002218,0.00000054,-0.00000494,0.00000170,-0

.00000235,0.00000298,0.00001516,0.00001193,-0.00000456,0.00000759,-0.0

0000119,0.00000424,0.00000540,0.00000325,-0.00000198,-0.00000056,0.000

00225,0.00000547,0.00000167,-0.00000543,-0.00000597,-0.00000909,-0.000

00029,0.00000044,-0.00000781,-0.00000476,-0.00000702,-0.00000683,0.000

00012,0.00000330,-0.00000021,-0.00000030,0.00000461,0.00000395,0.00000

256,0.00000425,0.00000196,-0.00000298|||@

**H2NOO. – CBS-QB3**

Temperature= 298.150000 Pressure= 1.000000

E(ZPE)= 0.030638 E(Thermal)= 0.034531

E(SCF)= -205.221783 DE(MP2)= -0.651558

DE(CBS)= -0.068298 DE(MP34)= -0.023921

DE(CCSD)= -0.022002 DE(Int)= 0.019797

DE(Empirical)= -0.030489

CBS-Q (0 K)= -205.967617 CBS-Q Energy= -205.963723

CBS-Q Enthalpy= -205.962779 CBS-Q Free Energy= -205.993390

1|1|UNPC-UNK|Mixed|CBS-QB3|CBS-QB3|H2N1O2(2)|PCUSER|16-Dec-1999|0||#N

CBS-QB3 GUESS=READ GEOM=ALLCHECK TEST||Radicale H2N-O-O da HIN||0,2|H,

-0.0502247167,1.3558145492,-1.1572672648|N,0.0582133102,1.1326409509,-

0.1666456419|H,1.050368257,0.9663041101,0.0142009397|O,-0.51597465,-0.

2055486914,-0.0708691271|O,0.3400200611,-1.0757769731,0.3595673545||Ve

rsion=x86-Win32-G98RevA.7|HF/CbsB3=-205.2217832|E2(CBS)/CbsB3=-0.71985

65|CBS-Int/CbsB3=0.0197971|OIii/CbsB3=5.2391638|MP2/CbsB4=-205.6837161

|MP4(SDQ)/CbsB4=-205.7076374|MP4(SDQ)/6-31+G(d')=-205.687258|QCISD(T)/

6-31+G(d')=-205.70926|CBSQB3=-205.9676169|FreqCoord=-0.0949109525,2.56

21179893,-2.1869180261,0.1100072051,2.1403810407,-0.3149146005,1.98490

81929,1.8260499898,0.0268358848,-0.9750507056,-0.388430704,-0.13392323

13,0.6425447461,-2.032923704,0.6794837744|PG=C01 [X(H2N1O2)]|NImag=0||

0.05416438,0.00570030,0.06684655,0.05505209,-0.08638748,0.40003905,-0.

05396104,-0.00909237,-0.06492220,0.53232352,-0.01035801,-0.03729231,0.

09552488,-0.04144695,0.23222453,-0.03193975,0.04430636,-0.39769340,0.1

3479684,-0.13354660,0.48840029,-0.00090552,0.00282693,0.00655788,-0.38

298611,0.04808460,-0.07994810,0.40284927,0.00923363,-0.00084213,-0.004

42782,0.09446527,-0.05629469,0.03872965,-0.05042939,0.06629551,-0.0397

1310,0.00440545,-0.00718613,-0.03640554,0.02672574,-0.04694554,0.07439

141,-0.02603058,0.05391623,0.00150564,0.00249207,0.00249888,-0.1320999

0,-0.02553264,-0.03091356,-0.02392182,-0.05520905,0.00264185,0.3981252

0,-0.00552983,-0.02094288,-0.00284709,-0.07583395,-0.05857489,0.020997

13,-0.00511507,-0.01953486,-0.00583110,-0.04988995,0.28705757,0.015759

99,0.03533691,0.00423475,-0.03439607,-0.01474684,-0.04021058,-0.001432

29,-0.00598600,0.00210618,0.12319021,-0.09392773,0.08131128,-0.0008034

6,-0.00192693,0.00081335,0.03672354,0.02925300,0.00800457,0.00496418,0

.00193954,-0.00091463,-0.24360912,0.13636880,-0.10312183,0.20272487,0.

00095391,-0.00776923,-0.00186249,0.03190798,-0.08006264,0.02951346,0.0

0463293,0.01037617,0.00073048,0.12813959,-0.18800493,0.07932366,-0.165

63441,0.26546065,0.00084077,0.00233876,0.00060574,0.00092699,0.0260428

2,-0.00355076,0.00043110,-0.00228526,-0.00189074,-0.09741739,0.0816087

9,-0.04744162,0.09521853,-0.10770511,0.05227739||-0.00001748,-0.000000

96,0.00000802,0.00006440,0.00003340,-0.00002582,-0.00001885,-0.0000014

4,0.00002162,-0.00001428,-0.00005487,-0.00000090,-0.00001379,0.0000238

9,-0.00000291|||@

**H2N-O4-NH2 – CBS-QB3**

Temperature= 298.150000 Pressure= 1.000000

E(ZPE)= 0.065587 E(Thermal)= 0.072934

E(SCF)= -410.316342 DE(MP2)= -1.508650

DE(CBS)= -0.143710 DE(MP34)= 0.008980

DE(CCSD)= -0.071587 DE(Int)= 0.043481

DE(Empirical)= -0.060205

CBS-Q (0 K)= -411.982446 CBS-Q Energy= -411.975099

CBS-Q Enthalpy= -411.974155 CBS-Q Free Energy= -412.013598

1|1|UNPC-UNK|Mixed|CBS-QB3|CBS-QB3|H4N2O4|PCUSER|18-Dec-1999|0||#N CBS

-QB3 GEOM=ALLCHECK TEST||H2-N-O-O-O-O-NH2 gia' ottimizzato||0,1|H,2.20

30087069,0.0713851816,-0.9607590192|N,1.854802792,0.3036168566,-0.0325

688396|H,2.5126040753,0.8518355897,0.5184396694|O,1.4162175398,-0.7669

254117,0.627002154|O,-0.406073416,-0.6737976112,0.8467915455|O,-1.0013

285583,-1.1053074597,-0.1472828211|O,-1.3592697984,0.5810238977,-1.064

5117754|N,-0.8234557554,1.3767551281,-0.2553587771|H,0.2092551246,1.40

09126297,-0.2248831166|H,-1.3406632999,1.6333153849,0.5867029596||Vers

ion=x86-Win32-G98RevA.7|HF/CbsB3=-410.316342|E2(CBS)/CbsB3=-1.6523603|

CBS-Int/CbsB3=0.0434812|OIii/CbsB3=10.3981112|MP2/CbsB4=-411.4462718|M

P4(SDQ)/CbsB4=-411.4372913|MP4(SDQ)/6-31+G(d')=-411.3992754|QCISD(T)/6

-31+G(d')=-411.4708629|CBSQB3=-411.9824459|FreqCoord=4.1630828065,0.13

4898433,-1.8155712874,3.5050690397,0.5737526646,-0.0615461825,4.748133

2201,1.6097358519,0.9797089167,2.6762630904,-1.4492788819,1.1848622652

,-0.7673674875,-1.2732928569,1.6002039904,-1.8922365997,-2.088728232,-

0.2783241748,-2.5686474636,1.0979759595,-2.011635567,-1.5561057414,2.6

016899455,-0.4825581175,0.3954348472,2.647341004,-0.4249674697,-2.5334

862797,3.0865185303,1.1087078303|PG=C01 [X(H4N2O4)]|NImag=0||0.0766897

9,-0.00816144,0.08191978,-0.12020866,0.08772108,0.36504427,-0.07387467

,0.01206403,0.09788607,0.35500859,0.00840712,-0.07354347,-0.10285624,0

.21779370,0.37129025,0.13476231,-0.12064815,-0.33307287,-0.03908690,0.

13682966,0.65851010,0.00627028,0.01332078,0.00872720,-0.18227840,-0.15

389924,-0.13741450,0.18777157,-0.00319692,-0.00417786,-0.00521797,-0.1

1605222,-0.10408783,-0.10255769,0.14612636,0.14986631,-0.02563345,-0.0

1354490,-0.01285218,-0.12150580,-0.11032576,-0.19016021,0.12755566,0.1

0573920,0.18405058,-0.00692434,-0.02069467,0.01821498,-0.08245955,-0.0

3923996,0.02165225,-0.00925888,-0.03430674,0.01937960,0.14331983,0.000

48376,-0.00344405,0.02034898,-0.09798597,-0.19701372,0.08757654,-0.002

29218,-0.04319756,0.01690616,0.06884454,0.27594911,0.00272669,0.048668

43,-0.02113124,0.05261896,0.07291162,-0.12467755,0.00607264,0.00077743

,0.01788961,-0.04736483,-0.12471170,0.14938009,-0.00166401,0.00407090,

-0.00417368,-0.00714764,-0.02436149,0.01726701,0.00441587,0.00468792,-

0.00238552,-0.02522650,0.02834334,0.01356896,0.17531137,0.00291807,-0.

00028511,0.00129070,-0.01831728,0.00704155,-0.00465012,-0.00276601,0.0

0021581,0.00104326,0.03442504,-0.03692535,0.00252799,0.05495603,0.1502

2026,0.01099144,0.00056646,0.00276496,0.01066207,0.02451362,-0.0179404

9,-0.00017735,-0.00159675,-0.00152251,0.00568010,-0.02003495,-0.021008

40,0.15299581,0.12323012,0.42550073,0.00075238,-0.00107902,-0.00079260

,0.00063069,-0.00826886,0.00318029,-0.00409327,0.00103103,0.00269319,-

0.01776595,-0.00579238,-0.02456260,-0.13916889,-0.08008012,-0.16605709

,0.17440634,-0.00139753,-0.00057372,-0.00069155,0.00056806,-0.00093709

,0.00226291,0.00016107,-0.00020919,0.00065918,-0.01327070,0.00725932,-

0.00019723,-0.06210224,-0.10950759,-0.12517955,0.09287674,0.18017805,-

0.00440556,-0.00108173,-0.00127018,0.00068006,-0.02003228,0.00966291,-

0.00341089,0.00212979,0.00246694,-0.02081502,0.02152071,-0.00150073,-0

.16064925,-0.16893338,-0.35011043,0.19182380,0.14912850,0.35796966,-0.

00078250,0.00028067,-0.00051973,0.00306459,-0.00556291,0.00318874,-0.0

0028584,0.00059254,0.00052990,0.00034051,0.00918081,-0.00394717,-0.011

03189,-0.00089180,-0.03416488,-0.01362645,-0.00600033,0.01411904,0.194

37475,-0.00294618,0.00006886,-0.00113058,0.00560243,-0.01220137,0.0070

4807,-0.00235146,0.00100022,0.00141221,-0.00264209,0.00994673,-0.00793

816,0.00432154,-0.03077793,0.00958477,0.01473040,0.00823364,0.02077625

,0.12745156,0.22778122,-0.00285929,0.00009589,-0.00088513,0.00385742,-

0.00918323,0.00478007,-0.00121745,0.00047276,0.00118587,0.00494708,0.0

0574814,-0.00322236,-0.03604552,0.02059349,-0.05740556,0.00887597,-0.0

1870336,-0.00141311,0.17001702,0.20181197,0.35293604,0.00063644,0.0008

0742,0.00021841,-0.01645666,0.01341361,-0.00421867,0.00012428,0.000275

34,-0.00118002,0.00011496,-0.00557661,0.00359373,-0.00131868,0.0122613

1,0.01489986,0.00300868,-0.01300443,-0.01494704,-0.18488094,-0.1203233

9,-0.09954453,0.73919246,0.00286472,0.00021646,0.00109704,0.00126601,0

.00957808,-0.00380924,0.00273576,-0.00128172,-0.00157218,0.00475601,-0

.00669735,0.00520964,-0.01267376,0.02571671,-0.01865214,-0.01037121,-0

.08962112,0.00408619,-0.09456071,-0.17467929,-0.15963789,0.07633933,0.

29737147,0.00141262,0.00060398,0.00029039,-0.00423893,0.00559062,0.001

13748,0.00131341,-0.00060122,-0.00079717,0.00126621,-0.00740588,0.0035

1355,0.01902096,0.02355049,0.01932462,-0.01635684,-0.00945396,-0.01515

641,-0.10672856,-0.20415614,-0.26072195,-0.07190461,0.28445969,0.57429

796,-0.00194054,-0.00030327,0.00043631,0.00647811,-0.01377375,0.003599

48,-0.00307383,0.00102747,0.00065701,-0.00034085,0.00746278,-0.0044643

8,0.00547496,-0.00219188,0.00520656,-0.00312988,0.00590186,-0.00433327

,-0.01325165,-0.02326222,-0.02623530,-0.35452695,0.00091047,0.02645356

,0.36547495,0.00144201,-0.00016508,-0.00031404,-0.00459975,0.00193419,

-0.00321575,-0.00064834,0.00159678,-0.00047766,0.00073422,-0.00639284,

0.00333359,0.00015528,-0.00522382,0.00392295,-0.00453557,0.00248314,-0

.00027456,-0.03318976,-0.00956168,-0.00981723,0.01441816,-0.02645300,-

0.02721882,0.02146047,0.04183424,0.00297522,-0.00220824,0.00099287,-0.

00126321,0.00127617,-0.00718776,-0.00155585,0.00101959,-0.00023148,-0.

00135707,0.00008934,0.00052763,0.00020656,0.00269476,-0.00058810,0.003

34007,-0.00181705,-0.00152879,-0.03993716,-0.00486899,-0.00098496,0.00

704313,-0.02828843,-0.06024566,0.00384057,0.02808720,0.06576260,0.0008

3717,-0.00030541,0.00021166,-0.00296507,0.00549181,-0.00292994,0.00040

822,-0.00018479,-0.00011057,-0.00179926,-0.00266810,0.00175801,0.00035

542,-0.00031337,-0.00003652,-0.00101366,-0.00373249,0.00193813,0.02607

942,-0.00058060,-0.02179539,-0.18589360,0.02873340,0.14976221,-0.00116

431,0.00476326,0.02670772,0.16515566,-0.00041360,-0.00001582,-0.000247

44,-0.00033908,-0.00206062,0.00116378,-0.00038672,0.00027506,0.0001605

2,0.00139435,0.00051573,-0.00058162,0.00260247,-0.00047452,0.00364545,

0.00148900,0.00269456,-0.00731949,0.00269992,-0.01981039,-0.03138052,0

.02138928,-0.03415026,-0.06536880,0.00276809,-0.00005193,0.00401565,-0

.03120371,0.05307820,0.00023869,-0.00017281,0.00011913,0.00039025,0.00

127579,-0.00105174,0.00010716,-0.00016512,-0.00002943,-0.00160328,-0.0

0003734,0.00022941,0.00019466,-0.00134729,0.00098519,-0.00214421,0.003

99210,0.00088013,-0.00255720,-0.02253939,-0.03426891,0.16603974,-0.082

89269,-0.26164283,-0.00516053,0.00597431,0.00348365,-0.15550531,0.0959

1247,0.29129540||0.00001857,0.00000692,-0.00000200,0.00004153,0.000059

88,-0.00004894,0.00000310,0.00002020,-0.00000407,-0.00008579,-0.000108

01,0.00005601,0.00002182,-0.00001241,0.00004653,-0.00000138,0.00000855

,-0.00001512,-0.00004238,-0.00002293,-0.00005681,-0.00003301,-0.000001

08,-0.00002699,0.00007254,0.00003589,0.00001931,0.00000499,0.00001298,

0.00003209|||@

# Dioxygen – CBSQB3

Temperature= 298.150000 Pressure= 1.000000

E(ZPE)= 0.003702 E(Thermal)= 0.006065

E(SCF)= -149.671117 DE(MP2)= -0.430161

DE(CBS)= -0.045968 DE(MP34)= -0.004752

DE(CCSD)= -0.009926 DE(Int)= 0.012226

DE(Empirical)= -0.018671

CBS-QB3 (0 K)= -150.164666 CBS-QB3 Energy= -150.162303

CBS-QB3 Enthalpy= -150.161359 CBS-QB3 Free Energy= -150.184632

1|1|UNPC-UNK|Mixed|CBS-QB3|CBS-QB3|O2(3)|PCUSER|27-Jun-2000|0||#N CBS-

QB3 TEST||dioxigen||0,3|O,0.,0.,-0.6028133078|O,0.,0.,0.6028133078||Ve

rsion=x86-Win32-G98RevA.9|State=3-SGG|HF/CbsB3=-149.6711166|E2(CBS)/Cb

sB3=-0.4761288|CBS-Int/CbsB3=0.0122263|OIii/CbsB3=3.1476626|MP2/CbsB4=

-149.9699464|MP4(SDQ)/CbsB4=-149.9746987|MP4(SDQ)/6-31+G(d')=-149.9746

987|QCISD(T)/6-31+G(d')=-149.9846246|CBSQB3=-150.1646665|FreqCoord=0.,

0.,-1.1391519741,0.,0.,1.1391519741|PG=D*H [C*(O1.O1)]|NImag=0||0.0001

3375,0.,0.00013375,0.,0.,0.81522263,-0.00013375,0.,0.,0.00013375,0.,-0

.00013375,0.,0.,0.00013375,0.,0.,-0.81522263,0.,0.,0.81522263||0.,0.,-

0.00000001,0.,0.,0.00000001|||@

# HOO. – CBS-QB3

E(ZPE)= 0.013980 E(Thermal)= 0.016840

E(SCF)= -150.231769 DE(MP2)= -0.438295

DE(CBS)= -0.048168 DE(MP34)= -0.016342

DE(CCSD)= -0.012640 DE(Int)= 0.013374

DE(Empirical)= -0.021207

CBS-Q (0 K)= -150.741067 CBS-Q Energy= -150.738207

CBS-Q Enthalpy= -150.737263 CBS-Q Free Energy= -150.763244

1|1|UNPC-UNK|Mixed|CBS-QB3|CBS-QB3|H1O2(2)|PCUSER|14-Dec-1999|0||#N CB

S-QB3 TEST||radicale H-O-O||0,2|H,-0.5722753344,0.,-1.101813534|O,-0.5

989216431,0.,-0.126510732|O,0.6704560599,0.,0.2642374238||Version=x86-

Win32-G98RevA.7|State=2-A"|HF/CbsB3=-150.2317688|E2(CBS)/CbsB3=-0.4864

632|CBS-Int/CbsB3=0.0133738|OIii/CbsB3=3.64158|MP2/CbsB4=-150.5321491|

MP4(SDQ)/CbsB4=-150.5484908|MP4(SDQ)/6-31+G(d')=-150.5336533|QCISD(T)/

6-31+G(d')=-150.546293|CBSQB3=-150.7410668|FreqCoord=-1.081443572,0.,-

2.0821256697,-1.131797794,0.,-0.2390706182,1.2669782405,0.,0.499336326

9|PG=CS [SG(H1O2)]|NImag=0||0.06979390,-0.00000026,0.00004208,-0.01968

607,-0.00001225,0.46513202,-0.04315124,0.00000172,0.04160692,0.4061796

3,0.00000051,0.00002794,0.00001017,-0.00000081,-0.00010432,0.08105678,

0.00001241,-0.46378099,0.03785879,-0.00001002,0.55294224,-0.02664265,-

0.00000146,-0.02192084,-0.36302839,0.00000030,-0.11891558,0.38967104,-

0.00000025,-0.00007002,0.00000208,-0.00000091,0.00007638,-0.00000240,0

.00000117,-0.00000637,-0.06137071,-0.00000016,-0.00135103,-0.07946571,

-0.00000016,-0.08916125,0.14083642,0.00000032,0.09051227||-0.00003033,

0.,-0.00018378,-0.00002683,0.,0.00012312,0.00005716,0.,0.00006066|||@

**H2NO3H – CBS-QB3**

Temperature= 298.150000 Pressure= 1.000000

E(ZPE)= 0.046174 E(Thermal)= 0.051197

E(SCF)= -280.614863 DE(MP2)= -0.939032

DE(CBS)= -0.095070 DE(MP34)= -0.022260

DE(CCSD)= -0.025576 DE(Int)= 0.028173

DE(Empirical)= -0.043142

CBS-Q (0 K)= -281.665594 CBS-Q Energy= -281.660572

CBS-Q Enthalpy= -281.659627 CBS-Q Free Energy= -281.692764

1|1|UNPC-UNK|Mixed|CBS-QB3|CBS-QB3|H3N1O3|PCUSER|14-Dec-1999|0||#N CBS

-QB3 TEST||H2-N-O-O-O-H gia' ottimizzato||0,1|H,0.787654196,0.77936005

87,-2.0355039479|N,0.8315451652,0.7471848538,-1.0209378323|H,1.7969790

414,0.7496758394,-0.7061414287|O,0.3062502577,-0.4945980717,-0.6510352

768|O,-0.8764813114,-0.2605734671,0.1674662093|O,-0.4405021191,0.01938

65685,1.4885859985|H,-0.3195840107,-0.873050112,1.8480747545||Version=

x86-Win32-G98RevA.7|HF/CbsB3=-280.6148629|E2(CBS)/CbsB3=-1.0341018|CBS

-Int/CbsB3=0.0281732|OIii/CbsB3=7.4511114|MP2/CbsB4=-281.2888116|MP4(S

DQ)/CbsB4=-281.3110714|MP4(SDQ)/6-31+G(d')=-281.2756192|QCISD(T)/6-31+

G(d')=-281.3011948|CBSQB3=-281.6655944|FreqCoord=1.4884506042,1.472776

9573,-3.8465447102,1.5713925093,1.4119746364,-1.9292927544,3.395797995

4,1.4166819168,-1.3344138094,0.578729071,-0.93465483,-1.2302782821,-1.

6563095126,-0.4924124528,0.316465248,-0.8324283026,0.0366353024,2.8130

196476,-0.6039262106,-1.649825486,3.4923548924|PG=C01 [X(H3N1O3)]|NIma

g=0||0.05273311,0.02342139,0.04607316,0.02976221,-0.01679083,0.4379169

8,-0.04776635,-0.02057792,-0.04285788,0.54228330,-0.02586360,-0.017784

16,0.02039618,0.08698233,0.19955197,-0.01354041,-0.03006258,-0.4240122

5,0.12182944,-0.07674974,0.59953050,-0.00076409,0.00587309,0.00576045,

-0.38357330,-0.01589693,-0.13592839,0.39727953,0.00289586,-0.00164984,

-0.00562526,0.03424925,-0.02019933,0.03291080,0.01173069,0.04664589,-0

.03879484,-0.00018191,-0.01033585,-0.10693870,0.02395411,-0.08797376,0

.12580353,-0.02227099,0.09482686,-0.00005609,-0.01320465,0.00795157,-0

.08297843,0.01041268,0.01039464,-0.00985049,-0.05185572,0.01108557,0.1

6932215,0.00264858,-0.02449861,-0.00024046,-0.06369542,-0.18163853,0.0

5085893,0.00215909,-0.02170821,-0.00475061,0.01336232,0.29885871,0.014

50994,0.04951445,-0.00252992,0.01455280,-0.00637511,-0.07281972,0.0055

7214,-0.00177064,0.00465391,-0.05786436,-0.00263298,0.14431062,-0.0037

5846,0.00406892,-0.00077151,-0.03141489,-0.05667603,0.01591385,-0.0043

2969,0.00233966,0.01103432,-0.10618476,0.04052275,-0.00487124,0.242882

19,-0.00372286,-0.00164988,0.00185031,-0.03828451,0.01885695,0.0191156

4,-0.00429615,-0.00382638,0.00336257,0.03936715,-0.06680007,-0.0207968

4,0.01502009,0.08663071,0.00590966,-0.00320994,-0.00143329,0.01432352,

0.03683227,-0.01519986,-0.00074095,-0.00446854,0.00013358,-0.00893404,

-0.02319604,-0.01866690,0.07353347,0.00445669,0.22796937,-0.00022190,0

.00034929,0.00012891,0.00517480,0.00150715,0.00081480,0.00132639,0.001

08319,-0.00259179,0.02832919,0.00889695,0.02679305,-0.09331297,-0.0234

4624,-0.06881155,0.07193508,0.00036821,-0.00050867,0.00042777,0.000646

47,0.00067839,0.00330860,0.00030420,0.00074117,0.00013678,0.00310894,-

0.00364094,-0.01740702,-0.00070945,-0.05138935,0.00375931,-0.04040252,

0.50709085,0.00220446,0.00048866,0.00046673,-0.00126817,0.00208723,0.0

0151158,-0.00060621,0.00124967,-0.00115924,0.03641946,-0.02317283,-0.0

5636826,-0.07948207,-0.03635079,-0.15518996,0.06477470,-0.10172693,0.2

9095619,-0.00016623,0.00006987,0.00002624,-0.00172511,-0.00046560,0.00

051608,-0.00008838,-0.00044294,0.00040192,0.00141842,-0.00389426,0.001

30766,-0.00388142,0.01536253,-0.01528012,-0.01323059,0.03668412,-0.022

04215,0.01767330,0.00025242,0.00001799,-0.00001774,0.00067980,0.000534

71,0.00061838,0.00012601,-0.00000330,-0.00024996,-0.00119072,-0.000572

34,-0.00053187,-0.00456593,0.01817800,-0.01417375,0.05201218,-0.452971

46,0.15742500,-0.04731372,0.43481641,-0.00005102,0.00024214,-0.0000724

0,0.00035901,-0.00014494,-0.00103650,0.00013942,-0.00002505,-0.0001455

1,0.00094716,0.00313398,0.00142027,-0.01535682,0.02836243,-0.03761293,

-0.02110812,0.11150148,-0.08021705,0.03507037,-0.14307005,0.11766413||

0.00000148,0.00000373,0.00000299,0.00003870,-0.00003874,-0.00002700,-0

.00000799,0.00000835,-0.00000352,-0.00004699,0.00003191,0.00005196,0.0

0000071,-0.00002965,-0.00005653,0.00001606,0.00001284,0.00004267,-0.00

000198,0.00001155,-0.00001056|||@

**H2NOH – CBS-QB3**

Temperature= 298.150000 Pressure= 1.000000

E(ZPE)= 0.039881 E(Thermal)= 0.043100

E(SCF)= -131.038464 DE(MP2)= -0.461325

DE(CBS)= -0.046970 DE(MP34)= -0.017205

DE(CCSD)= -0.009079 DE(Int)= 0.014632

DE(Empirical)= -0.023059

CBS-Q (0 K)= -131.541587 CBS-Q Energy= -131.538368

CBS-Q Enthalpy= -131.537424 CBS-Q Free Energy= -131.564063

1|1|UNPC-UNK|Mixed|CBS-QB3|CBS-QB3|H3N1O1|PCUSER|14-Dec-1999|0||#N CBS

-QB3 GUESS=READ GEOM=ALLCHECK TEST||H2-N-O-H||0,1|H,1.0046415116,0.925

6836939,0.0635812444|N,0.3671021957,0.2851265678,0.5339231745|H,-0.318

4811766,0.8785098899,0.9985313989|O,-0.3777005957,-0.3180063171,-0.550

5747105|H,-0.2342709392,-1.2560290218,-0.3949771809||Version=x86-Win32

-G98RevA.7|HF/CbsB3=-131.0384639|E2(CBS)/CbsB3=-0.5082948|CBS-Int/CbsB

3=0.0146324|OIii/CbsB3=3.9824781|MP2/CbsB4=-131.3774133|MP4(SDQ)/CbsB4

=-131.3946179|MP4(SDQ)/6-31+G(d')=-131.3585504|QCISD(T)/6-31+G(d')=-13

1.3676291|CBSQB3=-131.5415872|FreqCoord=1.8984971736,1.7492885335,0.12

015113,0.6937225597,0.5388110853,1.0089684988,-0.6018421562,1.66014297

01,1.886950735,-0.7137506316,-0.600944802,-1.0404353391,-0.4427078823,

-2.3735506849,-0.7463986436|PG=C01 [X(H3N1O1)]|NImag=0||0.19802831,0.1

5592270,0.18815610,-0.11913260,-0.09390374,0.14783133,-0.16391763,-0.1

6475609,0.14513889,0.49736294,-0.11859172,-0.18296641,0.11224496,0.048

43991,0.45386070,0.10340929,0.10555276,-0.14071438,-0.17841540,0.05990

347,0.37570285,-0.01961859,0.02050913,0.00963102,-0.23550653,0.1383747

8,0.13512967,0.24149431,-0.01876042,0.01221210,0.01705790,0.14891382,-

0.16252679,-0.11677002,-0.13404331,0.16741885,0.01855142,-0.01037109,-

0.00943498,0.09160110,-0.07304988,-0.08955386,-0.11839829,0.11211461,0

.12508777,-0.01211449,-0.00607443,-0.03187300,-0.09462799,-0.03961861,

-0.05860888,0.01432930,0.00337820,0.00945468,0.12122375,-0.01866247,-0

.01597962,-0.03272311,-0.03513383,-0.09918510,-0.05196825,-0.02241952,

-0.01581060,-0.02792554,-0.02632725,0.62209033,-0.00100496,0.00023764,

0.00489335,-0.05838320,-0.05831602,-0.14019579,-0.02335056,-0.00656733

,-0.02171949,0.11599442,-0.00777712,0.20207965,-0.00237758,-0.00560128

,-0.00376434,-0.00331085,-0.02860440,-0.00151466,-0.00069849,0.0005117

0,-0.00120891,-0.02881057,0.10254305,-0.03325571,0.03519749,0.00009191

,-0.00142215,-0.00267601,0.00253618,-0.00918242,0.00328205,-0.00242108

,-0.00129354,-0.00076810,0.06864207,-0.49111500,0.07242281,-0.06884907

,0.50301311,-0.00182315,-0.00151556,-0.00257533,0.00005862,-0.04078259

,-0.00523885,-0.00301187,-0.00583513,-0.00437943,-0.03496722,0.1203940

2,-0.04505771,0.03974362,-0.07226075,0.05725131||0.00005502,0.00009219

,-0.00009223,0.00025150,-0.00006252,0.00035831,-0.00010678,0.00008703,

0.00002553,-0.00020199,-0.00015360,-0.00029598,0.00000225,0.00003691,0

.00000437|||@

**H2O2 – CBS-QB3**

Temperature= 298.150000 Pressure= 1.000000

E(ZPE)= 0.026193 E(Thermal)= 0.029463

E(SCF)= -150.831096 DE(MP2)= -0.491753

DE(CBS)= -0.051498 DE(MP34)= -0.012040

DE(CCSD)= -0.009813 DE(Int)= 0.015081

DE(Empirical)= -0.023870

CBS-QB3 (0 K)= -151.378795 CBS-QB3 Energy= -151.375524

CBS-QB3 Enthalpy= -151.374580 CBS-QB3 Free Energy= -151.401134

1|1|UNPC-UNK|Mixed|CBS-QB3|CBS-QB3|H2O2|PCUSER|02-Mar-2001|0||# CBS-QB

3 TEST||H2O2||0,1|O,-0.7098679362,-0.045396574,0.1594113009|H,-0.64316

54175,0.0984916326,1.112242811|O,0.7001469691,-0.0525369076,-0.1960098

271|H,0.7209331539,0.6849762204,-0.8194546009||Version=x86-Win32-G98Re

vA.9|HF/CbsB3=-150.831096|E2(CBS)/CbsB3=-0.5432508|CBS-Int/CbsB3=0.015

0814|OIii/CbsB3=4.1225561|MP2/CbsB4=-151.1797228|MP4(SDQ)/CbsB4=-151.1

917629|MP4(SDQ)/6-31+G(d')=-151.1606117|QCISD(T)/6-31+G(d')=-151.17042

46|CBSQB3=-151.3787948|FreqCoord=-1.3414558875,-0.0857870856,0.3012436

782,-1.2154064044,0.1861221978,2.1018341456,1.3230859234,-0.0992803597

,-0.3704048644,1.362366117,1.2944173652,-1.5485446559|PG=C01 [X(H2O2)]

|NImag=0||0.28959750,0.02448402,0.02919789,-0.01410483,0.06294166,0.57

689133,-0.04300198,-0.01285369,-0.08736671,0.06865423,-0.01019024,-0.0

1264555,-0.07729582,0.00962855,0.01346209,-0.03027067,-0.07403588,-0.4

9884825,0.03323607,0.07350737,0.49969880,-0.22450874,0.01849215,0.0632

7237,-0.01909021,0.00272882,-0.00407793,0.27790678,-0.01884746,-0.0225

5001,0.02191793,0.00113948,-0.00155481,0.00193385,-0.01936462,0.332167

87,0.04813993,0.01002677,-0.07412995,0.05100584,0.00093595,0.00064361,

-0.07479667,-0.27015823,0.28561924,-0.02208679,-0.03012249,0.03819915,

-0.00656203,-0.00216713,0.00111254,-0.03430784,0.03707262,-0.02434910,

0.06295666,0.00455367,0.00599766,-0.00756380,0.00208566,0.00073827,-0.

00140532,-0.00185634,-0.30806307,0.25919553,-0.00478300,0.30132716,-0.

00376444,0.00106745,-0.00391315,0.00312480,0.00285250,-0.00149415,0.01

560224,0.24630644,-0.21213290,-0.01496259,-0.25022641,0.21754019||-0.0

0022563,0.00000912,0.00004669,0.00000222,-0.00000494,0.00000176,0.0002

2665,-0.00000217,-0.00004404,-0.00000324,-0.00000201,-0.00000441|||@

**H2NO-*t*-Bu – CBS-QB3**

Temperature= 298.150000 Pressure= 1.000000

E(ZPE)= 0.150238 E(Thermal)= 0.158338

E(SCF)= -287.223388 DE(MP2)= -1.148061

DE(CBS)= -0.111188 DE(MP34)= -0.066478

DE(CCSD)= -0.029980 DE(Int)= 0.037646

DE(Empirical)= -0.058330

CBS-QB3 (0 K)= -288.449540 CBS-QB3 Energy= -288.441440

CBS-QB3 Enthalpy= -288.440496 CBS-QB3 Free Energy= -288.480528

1|1|UNPC-UNK|Mixed|CBS-QB3|CBS-QB3|C4H11N1O1|PCUSER|25-Sep-2000|0||#N

CBS-QB3 TEST GEOM=CONNECTIVITY MAXDISK=14MB||alcossiammina H2N-OBu-t||

0,1|C,0.2542756533,-0.1922004014,-1.8115294692|C,0.1623194807,-0.24065

6951,-0.2858810315|C,1.5529016237,-0.1961729191,0.3549931693|O,-0.5690

121016,0.9763551556,0.0247244243|C,-0.6307102677,-1.4643547652,0.18319

57977|H,-0.7447231519,-0.1798088043,-2.2533632969|H,0.7824121084,0.708

4415072,-2.132913046|H,0.7919462132,-1.0654138339,-2.1891989163|H,1.46

66066112,-0.1476138623,1.4417164666|H,2.1289362596,-1.0880914533,0.093

5191049|H,2.1026885255,0.6825353706,0.006822391|H,-0.7574920334,-1.439

7134705,1.266746017|H,-1.6184762964,-1.47812083,-0.2855947231|H,-0.110

8068065,-2.388741411,-0.083111868|N,-0.7673749051,1.1250472414,1.44400

35365|H,-1.7762978416,1.2286305824,1.5370254781|H,-0.3737913797,2.0420

34491,1.6478614444||Version=x86-Win32-G98RevA.9|HF/CbsB3=-287.2233883|

E2(CBS)/CbsB3=-1.2592482|CBS-Int/CbsB3=0.0376457|OIii/CbsB3=10.0742288

|MP2/CbsB4=-288.1147569|MP4(SDQ)/CbsB4=-288.1812346|MP4(SDQ)/6-31+G(d'

)=-288.0870673|QCISD(T)/6-31+G(d')=-288.1170473|CBSQB3=-288.44954|Freq

Coord=0.4805113103,-0.3632060936,-3.4232943171,0.3067393412,-0.4547756

946,-0.5402368148,2.934558556,-0.3707130635,0.6708398178,-1.0752769562

,1.8450437116,0.0467223872,-1.1918695842,-2.7672292563,0.3461898599,-1

.4073226945,-0.3397893705,-4.2582391838,1.478544495,1.3387603275,-4.03

06212145,1.4965613406,-2.0133402104,-4.1369860863,2.7714846282,-0.2789

497518,2.7244490751,4.0231061777,-2.0561946973,0.176725483,3.973505152

5,1.289804828,0.0128924496,-1.4314523816,-2.7206639612,2.3938028693,-3

.0584767193,-2.7932433467,-0.5396957705,-0.2093945019,-4.5140667244,-0

.157058657,-1.4501283011,2.1260310104,2.7287710106,-3.3567161947,2.321

775142,2.904556991,-0.7063632845,3.8588856473,3.1140065971|PG=C01 [X(C

4H11N1O1)]|NImag=0||0.57754729,-0.00101177,0.57812059,0.00490016,0.006

92992,0.46440871,-0.07653238,-0.00323560,0.00417097,0.47280927,-0.0026

0065,-0.07445014,0.00633317,0.03427865,0.43903504,-0.00049779,0.014344

39,-0.17784290,0.01540863,-0.03037868,0.52218536,0.00032906,-0.0010727

9,-0.00623514,-0.15251555,-0.01171869,-0.03719485,0.47600185,-0.000888

25,0.00155579,0.00097143,-0.01601763,-0.07403534,-0.00613943,-0.002671

59,0.57511312,-0.03354467,-0.00039823,-0.02060922,-0.03938383,-0.00220

391,-0.09941266,-0.04538314,-0.00185014,0.55750821,-0.00307610,0.00706

013,0.00814400,-0.08432740,0.04614866,-0.01568910,-0.02630332,0.039982

36,0.00936528,0.15802282,0.00501035,-0.00551445,-0.01060004,0.04363305

,-0.13793656,0.02969497,0.01631899,-0.01444603,-0.00302954,-0.10791715

,0.27166713,0.02327457,-0.03663371,-0.02356750,0.00279182,-0.00211148,

-0.07845142,-0.00354959,0.00965255,0.00608064,-0.04547415,0.04347064,0

.34825374,-0.00209309,-0.00461665,0.00409316,-0.11006448,-0.04795313,0

.01915957,-0.02188030,-0.02720785,0.00804719,0.00778045,0.02264259,-0.

00491947,0.54333143,-0.00311534,-0.00098704,0.00691018,-0.04306848,-0.

12511211,0.02251878,-0.00873554,-0.00070387,0.00046015,-0.00316373,-0.

04734587,0.00390427,-0.04946195,0.49809999,0.01885566,0.02988765,-0.01

566169,0.01713302,0.02582557,-0.09078899,-0.00817176,-0.01040989,0.005

23741,-0.00199167,-0.01068891,0.00486985,0.01890508,0.02872968,0.56722

471,-0.26929820,0.00194751,-0.09566993,0.00034098,-0.00013191,0.000885

37,0.00111974,0.00015285,-0.00046676,0.00068319,-0.00005096,0.00076407

,0.00055767,-0.00003873,0.00058237,0.29156906,0.00179245,-0.04711005,0

.00178793,0.00129607,-0.00177073,0.00029751,-0.00010500,-0.00007184,0.

00029116,-0.00040331,0.00022697,-0.00066802,0.00085580,-0.00007669,0.0

0015122,-0.00222648,0.04613537,-0.09260039,0.00147609,-0.08673318,-0.0

3260336,0.00071234,-0.01390502,0.00228367,-0.00026750,-0.00654241,-0.0

0009191,0.00084773,0.00205178,-0.00136186,-0.00096698,0.00144900,0.104

50106,-0.00253235,0.09566484,-0.10932212,-0.10572475,0.03555767,-0.002

65477,-0.00150662,0.00053794,0.00030941,0.00087452,-0.00049109,0.00022

426,-0.00015665,-0.00002114,0.00024732,0.00058663,0.00082277,-0.013374

15,-0.02487348,0.00885570,0.11471271,-0.10582016,-0.22644386,0.0622963

6,-0.00058989,-0.00265088,0.00008630,-0.00001654,0.00003053,-0.0005275

6,0.00043114,0.00080211,-0.00104464,0.00058645,0.00087916,0.00113132,0

.00089914,0.00123878,-0.00102268,0.11687093,0.24450768,0.03431326,0.05

946851,-0.06737404,0.01671659,0.02942218,-0.01003523,0.00138341,0.0007

0927,0.00157785,-0.00088176,0.00040293,0.00193268,-0.00004892,-0.00155

028,-0.00661938,-0.00539787,-0.01134389,0.00347298,-0.03890911,-0.0684

4108,0.07415649,-0.10995814,0.10376496,0.04443556,-0.00278938,0.001138

98,-0.00087495,-0.00007573,-0.00015074,-0.00036502,0.00003007,-0.00031

920,0.00105733,-0.00015117,0.00023056,-0.00018106,-0.01310891,0.023747

98,0.01099005,0.00861186,-0.01279436,-0.00670728,0.11618751,0.10397734

,-0.21507986,-0.07216304,-0.00114734,-0.00050390,0.00206785,0.00012229

,-0.00017169,0.00025215,-0.00017973,0.00035463,-0.00087663,-0.00015219

,-0.00008260,0.00033464,-0.00072621,0.00049301,0.00104586,0.01379731,-

0.01966151,-0.00909831,-0.11508198,0.23271228,0.04285090,-0.06944017,-

0.07732215,0.01599829,-0.02694565,-0.00634046,0.00030334,-0.00030245,0

.00118055,0.00003588,0.00088560,-0.00704908,-0.00005659,-0.00047416,0.

00116529,-0.00546822,0.01146704,0.00442918,-0.00587944,0.00735223,0.00

286747,-0.04835941,0.07803053,0.08320468,-0.00584665,0.00022607,-0.001

34732,0.00379685,-0.00240617,-0.03204199,-0.04847937,-0.00012382,0.025

13837,0.00199567,-0.00063914,0.00120728,0.00142322,0.00081164,-0.00036

691,-0.00004371,0.00014325,-0.00202154,-0.00002925,0.00016695,0.000054

58,0.00002174,-0.00021101,0.00017228,0.05198823,-0.00006157,0.00003060

,0.00004994,0.00034856,-0.00134183,-0.00085026,-0.00045712,-0.04839814

,-0.01147987,-0.00012717,-0.00013043,-0.00008210,0.00025769,-0.0001274

7,-0.00075161,0.00012626,0.00060355,-0.00002830,0.00004490,0.00026645,

-0.00038211,-0.00011679,0.00016642,0.00029374,0.00010969,0.04845279,-0

.00358667,-0.00013679,0.00013334,0.00105502,-0.00011948,-0.01530031,0.

02210432,-0.01088184,-0.30966918,0.00041706,-0.00042061,-0.00055439,0.

00076215,0.00041843,0.00042916,0.00000234,-0.00005779,-0.00093502,0.00

011373,-0.00005270,0.00026436,0.00015348,-0.00002162,0.00029003,-0.024

08359,0.01306508,0.33785680,0.00083264,0.00021124,0.00088089,-0.010508

22,0.02395068,0.01038460,-0.11785507,0.10921760,0.03214384,-0.00819156

,0.00275425,-0.00236604,0.00082066,0.00020276,0.00038255,0.00011178,-0

.00029650,0.00015381,-0.00001301,-0.00009299,-0.00005404,0.00023734,-0

.00032014,-0.00072415,-0.00197643,0.00127482,0.00064036,0.12652047,-0.

00002028,-0.00020067,-0.00022070,-0.00177714,-0.00106517,0.00002485,0.

11139193,-0.22096707,-0.05211436,0.00060920,0.00194355,0.00000443,-0.0

0036707,-0.00036075,-0.00002546,-0.00007995,0.00015923,0.00020678,0.00

012933,-0.00001086,-0.00008075,-0.00009747,0.00052926,0.00031736,-0.00

047417,-0.00061585,-0.00021707,-0.12218598,0.23962396,0.00026467,0.000

30270,0.00017098,-0.00537979,0.01183400,0.00255582,0.03316593,-0.05281

506,-0.06128006,-0.00443372,0.00137310,-0.00128552,0.00049414,-0.00014

310,0.00010331,0.00023721,-0.00009397,0.00018182,-0.00008633,0.0000473

6,-0.00003214,-0.00036099,-0.00014605,-0.00044308,0.01666674,-0.027157

45,-0.00577953,-0.03511267,0.05826216,0.06338679,0.00085043,-0.0003054

4,0.00167436,-0.01627869,-0.02661941,0.01003323,-0.10882481,-0.1018317

3,0.04158319,0.00359406,0.00057587,0.00033572,-0.00525169,0.00141455,-

0.00340136,0.00020349,0.00031421,0.00014650,0.00039269,0.00046386,-0.0

0091042,0.00001576,0.00011650,-0.00004948,-0.00190796,-0.00162954,0.00

077267,0.00931434,0.01373434,-0.00670673,0.11910276,0.00038700,-0.0000

0492,0.00030370,0.00035488,-0.00324795,0.00053150,-0.10396013,-0.21583

919,0.06786973,0.00015106,0.00177082,-0.00024131,-0.00045701,0.0009933

6,-0.00093953,0.00017237,0.00025301,-0.00014426,-0.00000636,0.00049746

,-0.00042077,-0.00013937,-0.00007059,0.00003801,0.00190373,0.00208849,

-0.00061919,-0.01318673,-0.01988101,0.00883116,0.11495430,0.23296904,-

0.00026944,-0.00103611,0.00094858,-0.00666430,-0.01234208,0.00321048,0

.04239921,0.06962690,-0.07571306,0.00127561,-0.00015988,0.00021433,-0.

00241694,0.00004607,-0.00094098,0.00024700,0.00006796,0.00011537,-0.00

027215,0.00028817,-0.00025032,-0.00004300,-0.00009330,-0.00006470,0.01

523321,0.02698950,-0.00831037,-0.00501878,-0.00689538,0.00201595,-0.04

418649,-0.07565621,0.07830013,-0.00159422,-0.00298297,0.00021046,-0.00

304169,0.00189939,0.01812673,0.00069178,0.00065100,0.00091218,0.000089

07,0.00105761,-0.00037382,-0.05179742,0.00059366,0.02807443,0.00025239

,-0.00013713,0.00029559,0.00041699,-0.00029070,0.00116203,0.00004216,-

0.00005600,-0.00037461,-0.00046658,-0.00046549,-0.00036655,-0.00003032

,-0.00004002,0.00006875,0.00019998,0.00010809,-0.00029523,0.05323819,-

0.00256148,-0.00471916,0.00056370,-0.00298186,0.00152654,0.02833178,0.

00126025,0.00060944,0.00010367,0.00056284,0.00189739,-0.00086093,0.001

20003,-0.04588220,-0.00939297,0.00001707,-0.00002161,-0.00025752,-0.00

041712,-0.00012023,0.00175652,-0.00018563,0.00020921,-0.00002976,-0.00

058886,0.00015543,-0.00038207,0.00009967,-0.00003030,-0.00017260,0.000

25032,-0.00002736,-0.00010379,0.00064036,0.04862032,0.00150843,0.00237

437,0.00063360,0.00082131,0.00040345,-0.01132589,-0.00062447,-0.000366

91,0.00042376,0.00027821,-0.00028409,-0.00067958,0.02908377,-0.0065149

3,-0.30889533,-0.00001248,-0.00016189,0.00027095,0.00018184,-0.0000095

7,-0.00067324,-0.00009872,-0.00015584,0.00022643,0.00035792,0.00004837

,0.00051238,-0.00001270,0.00007690,-0.00003191,-0.00005890,0.00008191,

0.00018966,-0.03304087,0.00773693,0.33646371,0.00025561,0.00083528,-0.

00111274,-0.01837871,0.00170122,-0.00784374,-0.00054749,-0.00375496,0.

00228586,0.00255134,0.00087107,0.00038236,-0.25662543,-0.00091768,-0.1

0112077,0.00056989,-0.00026691,0.00089530,0.00046146,0.00004908,0.0000

9721,-0.00007007,-0.00009333,-0.00001536,0.00015888,0.00009625,-0.0000

3994,0.00045657,0.00010747,0.00010156,-0.00110519,-0.00035711,-0.00062

465,0.00468356,0.00000382,0.00169380,0.28046912,0.00012900,0.00071022,

-0.00131037,-0.02540755,-0.00105260,-0.01177293,-0.00185235,-0.0044093

2,0.00203885,0.00123072,0.00292388,-0.00008044,0.00134700,-0.04633199,

0.00002783,0.00023820,0.00015550,0.00063833,0.00020548,0.00003109,-0.0

0018105,0.00014323,0.00000026,0.00008311,0.00023169,-0.00003050,0.0001

0516,-0.00013893,0.00024881,0.00018011,-0.00166830,0.00006242,-0.00050

151,-0.00123920,-0.00101495,-0.00062888,0.00254984,0.04810691,0.000968

38,-0.00020363,0.00083171,0.00976164,-0.00048242,0.00310347,0.00106987

,0.00144924,-0.00024820,-0.00012652,-0.00090336,0.00011828,-0.10289848

,-0.00006967,-0.09739679,-0.00000705,0.00037879,-0.00008915,-0.0001256

4,-0.00018042,0.00007999,0.00011135,-0.00001439,-0.00004884,0.00024852

,0.00020199,0.00023348,-0.00013226,0.00011013,-0.00010902,0.00042433,0

.00021085,0.00063757,-0.02962006,0.00078171,-0.01179876,0.11181443,-0.

00126964,0.10177935,0.00020663,0.00039558,-0.00021021,0.00757970,-0.01

200151,-0.00538222,-0.00010866,0.00024985,-0.00017598,0.00065239,-0.00

512899,0.00104045,-0.10775111,0.10589587,0.03142505,-0.00000803,0.0001

0085,0.00010663,0.00002347,0.00004121,-0.00027303,0.00022452,-0.000158

73,0.00014895,-0.00001159,-0.00003368,-0.00005952,-0.00045166,-0.00059

041,-0.00006871,0.00030723,0.00020115,0.00003269,-0.00244985,0.0019901

2,0.00040270,-0.01284587,0.02422330,0.00840890,0.11464023,0.00073052,0

.00056072,-0.00076709,0.01593696,-0.01775465,-0.00856888,0.00079166,0.

00065168,-0.00021139,-0.00270338,-0.00753899,0.00131531,0.10359237,-0.

23075003,-0.05370809,-0.00010159,-0.00003551,-0.00000443,-0.00021672,0

.00030216,-0.00004741,-0.00045896,0.00041499,0.00079428,0.00007049,-0.

00004924,0.00005551,-0.00099223,0.00043996,0.00002760,-0.00005160,0.00

040394,0.00019970,-0.00051753,-0.00004943,-0.00033329,-0.00049039,0.00

104192,0.00078740,-0.11541580,0.25140610,-0.00033880,-0.00000488,0.000

04112,-0.00598144,0.00782719,0.00116122,-0.00008921,-0.00043625,0.0000

1949,0.00103230,0.00352830,-0.00064458,0.03137420,-0.05467904,-0.06160

074,-0.00000348,0.00011063,-0.00001344,-0.00006958,-0.00024174,0.00012

533,0.00035218,0.00028075,-0.00031627,0.00012374,-0.00015169,-0.000032

13,-0.00014848,0.00001394,0.00030597,-0.00016151,0.00006089,-0.0001156

4,0.01582629,-0.02756254,-0.00586918,-0.00618151,0.01307871,0.00325363

,-0.03541446,0.05927273,0.06347381,-0.00168858,0.00362702,0.00044835,-

0.00885693,-0.00406212,0.02174173,-0.00224064,0.00175209,0.00037076,-0

.06167535,0.00503494,0.02252255,0.00213533,-0.00148410,-0.00149105,0.0

0040477,0.00008657,0.00053668,-0.00000557,0.00016440,-0.00056559,0.000

79535,0.00016673,0.00103502,-0.00057665,0.00017137,0.00220047,0.000760

29,-0.00011347,0.00124238,-0.00031522,-0.00004739,0.00037824,-0.000113

45,0.00096038,-0.00035877,-0.00000405,0.00010381,-0.00006476,-0.000070

02,-0.00041541,-0.00022217,0.58437098,0.00339418,-0.00524701,-0.001015

89,-0.00235856,-0.00049994,-0.03615384,0.00090526,0.00176434,0.0014810

8,0.00681396,-0.06594626,-0.02008522,-0.00063392,-0.00248827,0.0000699

7,-0.00013547,-0.00023963,0.00029378,0.00042815,0.00026971,-0.00028069

,0.00033283,0.00061120,-0.00155336,0.00116782,-0.00085486,-0.00081669,

-0.00076658,0.00015268,-0.00047396,0.00021082,-0.00006614,-0.00010426,

0.00026808,-0.00107556,-0.00239543,-0.00012282,-0.00028101,-0.00039708

,0.00049985,0.00099182,-0.00118895,0.09525641,0.45732885,0.00219845,-0

.00403844,0.00232790,0.00925920,-0.01469129,-0.01882481,-0.00089260,0.

00091946,0.00143331,0.00944645,0.00250753,-0.19494960,-0.00031498,0.00

079317,0.00130740,-0.00009812,0.00033450,0.00043601,-0.00026753,0.0002

6320,0.00034084,-0.00019569,0.00056553,-0.00072588,0.00008055,0.000453

76,0.00025476,-0.00112786,0.00046571,-0.00012073,0.00039707,0.00011249

,-0.00016981,-0.00046122,0.00017893,0.00000561,-0.00028704,-0.00028593

,-0.00026052,0.00018873,0.00124808,-0.00012633,-0.03619948,0.11063102,

0.28270164,-0.00003817,0.00023779,0.00005463,-0.00066027,-0.00087926,0

.00094309,0.00019085,-0.00013345,-0.00029832,0.00428484,0.00554407,0.0

0018292,-0.00015574,-0.00015311,0.00041141,0.00003365,0.00000027,0.000

04745,-0.00001713,0.00000865,-0.00003107,0.00005837,-0.00006832,0.0000

7401,0.00004501,-0.00010030,0.00025157,0.00009108,0.00001535,0.0001798

8,0.00002382,0.00001150,-0.00004730,-0.00011899,0.00008036,-0.00012799

,0.00004198,-0.00005534,0.00000645,-0.00000900,0.00005454,-0.00009612,

-0.41215206,0.01264720,0.03063297,0.42704433,0.00020364,-0.00089160,-0

.00004184,0.00249078,0.00164692,-0.00217944,0.00008357,-0.00072534,0.0

0008576,0.00469845,-0.00359726,0.00121911,0.00012210,0.00036385,-0.000

62736,-0.00006859,0.00007011,-0.00008656,-0.00004108,-0.00001328,0.000

14332,0.00000452,0.00000028,-0.00032847,-0.00039213,0.00028895,-0.0002

5456,0.00016510,-0.00004509,-0.00013419,-0.00007333,-0.00002757,-0.000

16666,0.00056143,-0.00044899,0.00049684,-0.00025242,-0.00020732,-0.000

36364,-0.00032994,-0.00003663,0.00033999,0.05810508,-0.03894768,-0.021

54717,-0.02431887,0.04278957,0.00104530,-0.00136231,-0.00017710,0.0010

0487,0.00494383,-0.00483883,-0.00050927,0.00033750,-0.00077570,0.04512

931,-0.01358569,-0.02624652,0.00009348,-0.00009033,0.00081301,-0.00009

732,-0.00004394,-0.00002926,-0.00003933,-0.00000612,0.00017981,-0.0001

5601,-0.00012593,-0.00055232,0.00025161,-0.00031696,0.00058982,0.00007

939,0.00000884,0.00043669,0.00002863,-0.00005533,-0.00005926,-0.000223

64,-0.00025888,-0.00001136,-0.00007761,-0.00007127,-0.00004154,-0.0000

8359,0.00001290,-0.00007132,-0.00909117,-0.01363193,-0.03440604,-0.029

97965,0.01986279,0.06264879,-0.00057408,0.00064441,0.00000513,0.002081

64,0.00076190,0.00230373,0.00018824,-0.00010020,0.00026213,0.00366556,

0.01076931,0.00314515,-0.00052561,0.00040298,0.00013222,-0.00001357,-0

.00002866,-0.00013337,0.00001585,-0.00007718,0.00005200,-0.00007127,0.

00001480,0.00030858,-0.00009141,0.00056213,-0.00033688,-0.00011887,-0.

00024168,-0.00027231,-0.00032100,-0.00008999,0.00027232,-0.00000158,-0

.00033027,0.00000693,-0.00007160,-0.00004059,0.00016091,0.00007160,0.0

0018708,-0.00000195,-0.10076817,-0.11790714,-0.01235887,-0.01866258,-0

.04095832,-0.00737499,0.11519687,0.00045502,-0.00032921,-0.00002738,-0

.00175487,-0.00078671,-0.00185443,-0.00028418,0.00004294,-0.00076753,0

.00680596,0.00086938,0.00311814,0.00024574,-0.00008749,0.00038596,0.00

000651,-0.00000945,0.00008967,0.00000555,0.00007551,-0.00007640,-0.000

01858,0.00007862,-0.00018786,0.00000397,-0.00050435,0.00033621,0.00010

396,0.00007933,0.00027818,0.00014457,0.00012620,-0.00015911,-0.0000505

8,0.00037147,-0.00036796,0.00004158,0.00004668,-0.00003586,0.00006124,

0.00000121,-0.00024802,-0.15930625,-0.34547225,-0.07791055,0.00710887,

-0.00021891,0.00438284,0.14643145,0.34571706,0.00065802,-0.00152940,-0

.00020814,-0.00410863,0.00197326,-0.00514980,-0.00005969,-0.00019689,0

.00078926,-0.00643527,-0.04303866,-0.03009312,0.00000448,0.00070776,-0

.00069526,0.00000180,0.00001513,0.00017554,0.00009169,0.00006159,-0.00

001346,0.00024217,0.00011782,-0.00050083,0.00032654,0.00009795,0.00001

679,0.00003153,0.00006262,-0.00007533,0.00007917,0.00003635,-0.0000079

1,0.00007954,-0.00043218,0.00055917,0.00003284,-0.00005009,-0.00004465

,-0.00008639,-0.00007291,0.00040907,-0.00248315,-0.03437860,-0.0392237

6,-0.00220397,0.00358210,0.00254113,0.01382930,0.07304413,0.07152130||

-0.00000176,-0.00000671,0.00000545,0.00003421,-0.00004277,-0.00002268,

0.00000110,0.00000999,0.00000817,-0.00002825,0.00003293,0.00002595,0.0

0000613,0.00001459,0.00001663,0.00000644,-0.00000880,-0.00000682,0.000

00287,-0.00000518,0.00000303,0.00000422,-0.00000700,0.00000157,-0.0000

0605,0.00000382,0.00000130,-0.00000399,-0.00000109,0.00000516,0.000000

26,-0.00000297,-0.00000049,-0.00000418,0.00000719,0.00000236,-0.000001

47,0.00000290,-0.00000147,-0.00000358,-0.00000264,0.00000438,0.0000001

4,-0.00002019,-0.00003624,-0.00000546,0.00001262,-0.00000193,-0.000000

63,0.00001332,-0.00000441|||@

***t*-Bu. – CBS-QB3**

Temperature= 298.150000 Pressure= 1.000000

E(ZPE)= 0.114766 E(Thermal)= 0.121191

E(SCF)= -156.725999 DE(MP2)= -0.665627

DE(CBS)= -0.066033 DE(MP34)= -0.059311

DE(CCSD)= -0.018016 DE(Int)= 0.023381

DE(Empirical)= -0.036018

CBS-Q (0 K)= -157.432857 CBS-Q Energy= -157.426432

CBS-Q Enthalpy= -157.425488 CBS-Q Free Energy= -157.462383

1\1\GINC-ORIGIN\Mixed\CBS-QB3\CBS-QB3\C4H9(2)\ANCANB44\10-Oct-2000\0\\

#N CBS-QB3 GEOM=ALLCHECK MAXDISK=10GB TEST\\t-Butylradical (optimized

z-matrix at CBSB7)\\0,2\C,-0.0259822174,-0.1438321454,-0.0154254293\C,

-0.0254508453,-0.1391118514,1.4797613948\C,1.2832663621,-0.1386960178,

-0.7375501776\C,-1.2500231643,0.3207134733,-0.7376470471\H,0.761365041

9,-0.7819149967,1.8874890841\H,0.1527086077,0.8716975208,1.8893628643\

H,-0.9850849932,-0.4734821567,1.8870514796\H,2.0186068334,-0.786177135

4,-0.2491312616\H,1.1752016262,-0.4671251808,-1.7762748156\H,1.7308133

487,0.8710768994,-0.7737690935\H,-2.1660749786,-0.0256762166,-0.248377

3734\H,-1.3132342695,1.4233621162,-0.7753070697\H,-1.2651620272,-0.026

2016028,-1.775876259\\Version=SGI64-G98RevA.7\HF/CbsB3=-156.7259993\E2

(CBS)/CbsB3=-0.7316597\CBS-Int/CbsB3=0.0233814\OIii/CbsB3=6.1961057\MP

2/CbsB4=-157.2588914\MP4(SDQ)/CbsB4=-157.3182026\MP4(SDQ)/6-31+G(d')=-

157.2438907\QCISD(T)/6-31+G(d')=-157.2619066\CBSQB3=-157.4328569\FreqC

oord=-0.0490992715,-0.2718033431,-0.0291498346,-0.0480951239,-0.262883

2808,2.7963435647,2.4250217948,-0.2620974693,-1.3937677386,-2.36220125

98,0.6060605853,-1.3939507952,1.4387713066,-1.4776050901,3.5668371755,

0.2885774247,1.6472694593,3.5703781065,-1.8615407127,-0.8947515367,3.5

660102227,3.8146137938,-1.4856593643,-0.4707898197,2.2208090549,-0.882

7385941,-3.356672682,3.2707629664,1.6460966549,-1.4622115652,-4.093288

1802,-0.0485210138,-0.4693651775,-2.4816529282,2.6897643821,-1.4651179

187,-2.3908095626,-0.0495138498,-3.355919519\PG=C01 [X(C4H9)]\NImag=0\

\0.50550262,-0.06396370,0.16458968,-0.00688033,-0.03747280,0.51155609,

-0.08413126,0.00569393,0.00058990,0.56507594,0.00570448,-0.05375903,0.

00349388,-0.01514900,0.48383730,0.00134779,0.00708249,-0.21194581,-0.0

0475266,-0.02754869,0.46623655,-0.18141690,0.00913049,0.05476137,0.001

22921,-0.00010608,0.00289735,0.48518069,0.00595781,-0.05368833,0.00328

881,0.00416123,0.00430001,-0.00245644,-0.03164981,0.48371747,0.0541726

6,0.00154379,-0.11477948,0.02989993,0.00486324,-0.01688064,0.03927835,

0.00003313,0.54610118,-0.17059827,0.03473031,-0.05010931,0.00025188,0.

00162514,-0.00357627,-0.02545000,0.01396225,-0.01208404,0.50584937,0.0

3788949,-0.06451772,0.02234024,-0.00266942,0.00521249,-0.00129207,-0.0

0243169,0.00524873,-0.00170374,0.02338621,0.46309473,-0.05014712,0.020

44039,-0.11475281,-0.02636755,0.01503138,-0.01689773,0.01071599,-0.005

84205,0.00891789,-0.03672873,0.01393268,0.54601607,-0.00131571,-0.0016

9124,-0.00256924,-0.18099523,0.10925697,-0.06331506,0.00053565,-0.0010

3905,0.00085585,0.00084599,0.00045218,-0.00017690,0.19416550,-0.001349

45,0.00144137,-0.00123178,0.10965472,-0.13372959,0.05713889,0.00010787

,-0.00005431,-0.00036117,-0.00094320,0.00045947,-0.00054129,-0.1215598

7,0.14439010,-0.02588876,0.01709200,-0.01356144,-0.06354665,0.05657393

,-0.07831480,-0.00163400,0.00046899,0.00126971,0.00185215,-0.00024775,

-0.00551302,0.07324665,-0.05953020,0.08837892,0.00016994,0.00074940,-0

.00145258,-0.04889223,-0.03433671,-0.01166437,-0.00014073,-0.00050722,

-0.00021190,0.00022571,0.00053790,0.00015675,0.00367855,0.02238638,0.0

0831088,0.04990540,0.00073396,0.00411036,-0.00835893,-0.03432355,-0.23

772386,-0.06600875,-0.00044987,0.00028379,-0.00013465,0.00046344,-0.00

004349,-0.00019331,-0.00300207,-0.01960483,-0.00597242,0.03892319,0.26

388641,-0.00513898,-0.02920579,-0.02123978,-0.01404401,-0.07950600,-0.

06820494,-0.00123631,0.00101625,0.00131572,0.00150828,0.00053687,0.001

35148,0.00222580,0.00994151,0.00410946,0.01492932,0.08470505,0.0806409

8,0.00000690,0.00225717,0.00205153,-0.24588502,-0.06833987,0.07887723,

0.00094361,-0.00065068,-0.00000586,0.00077222,0.00074008,-0.00091339,-

0.01823832,-0.00779991,0.00756024,-0.00530894,-0.00223244,0.00131123,0

.26656726,0.00191016,0.00017183,-0.00205385,-0.06874561,-0.06876329,0.

03199398,0.00075402,0.00030914,-0.00059251,-0.00041904,-0.00028829,-0.

00004016,0.01689905,0.00671252,-0.00830631,-0.02762598,-0.01067569,0.0

1008235,0.07699961,0.07197737,0.03013519,0.00711397,-0.01363736,0.0790

2006,0.03141880,-0.07815969,-0.00181282,0.00043682,-0.00549950,0.00169

439,-0.00014212,0.00126457,-0.00996659,-0.00522028,0.00371073,-0.00984

965,-0.00277125,0.00410458,-0.08910475,-0.03079503,0.08826793,-0.02268

930,0.01416950,-0.01388872,0.00077582,-0.00012841,-0.00177687,-0.15554

381,0.10287136,-0.07660865,-0.00330946,0.00000655,0.00414973,0.0005311

2,-0.00033917,0.00119560,0.00020485,0.00002188,0.00013331,0.00039959,-

0.00032970,-0.00017042,0.17458458,-0.00174318,0.00147661,-0.00060344,-

0.00027125,-0.00002830,0.00029460,0.10349053,-0.13502041,0.06844412,-0

.00095609,0.00044732,-0.00056593,0.00009582,0.00027348,-0.00046226,0.0

0011816,-0.00025130,-0.00010876,-0.00024416,0.00015633,-0.00016095,-0.

11136222,0.14582673,0.00923953,-0.00977762,0.00781932,0.00069163,-0.00

112351,0.00103752,-0.07625758,0.06823962,-0.10256643,0.00210939,0.0005

1124,-0.00134234,-0.00018742,0.00027320,0.00001965,0.00003022,0.000167

95,-0.00014736,-0.00005648,-0.00006170,0.00022541,0.08287047,-0.077608

45,0.10662774,0.00302738,0.00719798,0.02843208,-0.00476849,0.00005761,

0.00134784,-0.05053573,-0.00548331,-0.02906005,0.00150771,0.00023840,0

.00125149,0.00016875,-0.00025623,-0.00004581,0.00003869,0.00014340,0.0

0015076,0.00007040,-0.00005011,0.00136671,-0.00245024,-0.00820790,-0.0

1871025,0.05465381,-0.00080185,0.00015270,0.00264333,-0.00014052,0.000

33631,0.00094385,-0.00519019,-0.06793217,-0.07451813,-0.00024742,-0.00

027870,-0.00032141,-0.00021750,0.00015454,-0.00026156,-0.00015138,0.00

007178,0.00033416,-0.00023117,0.00029573,0.00006558,0.00095313,0.00667

668,0.01897810,0.01015468,0.07096868,0.00032016,-0.00144404,-0.0167584

0,0.00313447,-0.00077085,0.00021928,-0.02916874,-0.07383960,-0.2743889

1,-0.00130125,0.00071134,0.00056628,0.00007344,-0.00013449,0.00045797,

-0.00008509,-0.00033871,-0.00026120,0.00016105,-0.00023483,-0.00076917

,-0.00118781,-0.00422039,-0.01203945,0.02821961,0.08103939,0.30125930,

-0.01943388,-0.02528015,0.00544371,0.00037560,0.00065235,-0.00150444,-

0.07484462,-0.08662170,-0.00045847,0.00178089,0.00076378,0.00063565,0.

00000393,-0.00003685,0.00024234,0.00007897,0.00060518,0.00126680,-0.00

016308,0.00021740,0.00025828,0.00849790,0.01945551,-0.00029799,-0.0017

3330,-0.00454561,-0.00070393,0.08659614,-0.00693123,0.00416388,0.00466

046,-0.00032442,0.00030477,-0.00031541,-0.07482616,-0.23720894,0.00067

916,0.00004001,-0.00007221,0.00049663,0.00014254,-0.00025823,-0.000051

54,-0.00010631,-0.00007778,0.00075044,-0.00022510,0.00006894,0.0002896

4,-0.00679634,-0.01976459,0.00015631,-0.00346188,-0.01047389,-0.000659

07,0.09350353,0.26329870,0.00915579,0.01474230,-0.00186074,-0.00048968

,-0.00096185,0.00081951,0.00204644,0.00725085,-0.04248066,-0.00070626,

0.00022295,-0.00022399,0.00013604,0.00017432,0.00004708,0.00005959,-0.

00047433,-0.00063193,0.00002131,-0.00028431,-0.00005151,0.00568274,0.0

1463622,-0.00064957,-0.01194521,-0.02909214,0.00034444,-0.00453276,-0.

00552312,0.04433744,-0.02376944,-0.00467963,0.01280292,0.00081863,-0.0

0021041,0.00174749,-0.00254391,0.00110719,-0.00407693,-0.22092890,-0.0

7035217,0.09594418,0.00055779,0.00018645,0.00010658,0.00009553,-0.0001

4900,-0.00016641,0.00057951,0.00023041,-0.00127611,-0.00118157,-0.0000

9572,0.00052207,0.00035492,0.00000626,-0.00013129,-0.00020964,-0.00036

804,0.00010525,0.24432461,0.01121659,0.00256853,-0.00546452,-0.0000357

6,-0.00005684,-0.00035268,0.00207114,-0.00032397,0.00092933,-0.0709914

1,-0.06946387,0.03706976,0.00008985,-0.00000298,-0.00021116,-0.0002529

7,-0.00014950,-0.00005549,-0.00020863,0.00021861,-0.00000685,0.0006047

1,0.00017700,-0.00002684,-0.00015331,0.00000189,0.00026108,0.00039411,

0.00006644,-0.00003833,0.07411024,0.07585543,-0.01210644,-0.00588408,0

.00783202,-0.00103726,-0.00080692,0.00103529,-0.00179587,0.00122542,-0

.00134775,0.09553669,0.03699898,-0.10275299,0.00003374,-0.00007969,0.0

0022586,0.00002602,0.00016341,-0.00015086,0.00027920,0.00018794,0.0000

3759,-0.00050030,0.00015780,0.00059715,-0.00006706,0.00021757,0.000422

02,0.00011907,0.00004884,-0.00000198,-0.10503390,-0.04343428,0.1068471

5,-0.00590213,0.02907197,-0.00350898,0.00025991,-0.00062394,0.00130318

,0.00129176,-0.00128478,-0.00041525,-0.04177475,0.01307220,0.00066452,

-0.00013206,-0.00014583,-0.00013890,-0.00009851,-0.00060106,-0.0009231

9,-0.00006600,-0.00003670,-0.00024526,-0.00018055,-0.00029747,-0.00009

405,-0.00013042,0.00015775,-0.00005486,-0.00078997,-0.00071654,0.00030

812,0.00082100,-0.02719157,0.00036555,0.04688111,0.01071634,-0.0093394

0,0.00629265,0.00033353,0.00040379,-0.00083571,-0.00055982,0.00042986,

0.00068328,0.00127644,-0.27029947,0.00079668,0.00030422,0.00004107,0.0

0036184,0.00011080,0.00010709,0.00114873,-0.00021672,-0.00018639,0.000

03279,0.00046861,0.00003328,0.00009044,-0.00007626,-0.00017960,-0.0001

9847,0.00105564,0.00010239,-0.00046145,-0.00094389,-0.01205513,0.00005

459,-0.01205883,0.30301770,-0.00339586,0.01702433,-0.00190753,0.000124

54,-0.00104523,0.00082986,0.00073883,-0.00004020,-0.00021997,0.0006466

0,0.00781197,-0.04248662,-0.00012508,-0.00026691,-0.00005469,-0.000219

85,-0.00043576,-0.00063555,-0.00006965,0.00020600,0.00005272,-0.000113

34,0.00000127,-0.00000413,-0.00021448,-0.00012444,0.00009764,-0.000448

66,-0.00032191,0.00025347,-0.00017023,0.01572528,-0.00067378,0.0023127

4,-0.00711600,0.04435915,0.00055004,-0.00738603,-0.02567236,-0.0041148

4,0.00159789,-0.00093120,0.00129474,-0.00082327,-0.00128566,-0.0491724

5,-0.00163353,0.00081542,0.00019407,0.00009510,-0.00126030,0.00004277,

-0.00013306,-0.00001660,0.00032189,0.00019649,-0.00004904,0.00036110,0

.00001794,0.00014047,-0.00020349,0.00025382,0.00072423,-0.00015894,0.0

0006996,0.00015861,0.00108153,0.01034704,0.02418052,-0.00017938,-0.000

41006,0.00093445,0.04998298,0.00066058,0.00262951,0.01246596,0.0018161

3,-0.00033377,0.00135597,-0.00034041,-0.00006089,0.00013414,-0.0019266

6,-0.06949900,-0.08026336,0.00026910,0.00017739,0.00054644,0.00015474,

0.00006702,0.00036069,0.00015182,0.00000320,-0.00026113,-0.00013990,-0

.00000281,0.00018126,-0.00010307,0.00020605,-0.00017138,-0.00016318,-0

.00014948,-0.00019110,0.00115832,0.00316440,0.01115041,0.00065481,-0.0

1207520,-0.03141841,-0.00219228,0.07587358,-0.00081363,-0.00125490,-0.

01676406,-0.00322273,0.00038181,0.00022557,0.00146698,0.00021841,0.000

55879,0.00115835,-0.07968061,-0.27414683,-0.00023122,-0.00016211,-0.00

077544,-0.00002934,-0.00034828,-0.00025058,-0.00011164,-0.00010159,0.0

0045373,0.00021427,0.00019617,0.00042250,-0.00072564,0.00009570,0.0008

5021,-0.00001961,-0.00021043,0.00009845,-0.00037361,-0.00439530,-0.012

06969,0.00042637,-0.00084939,0.00038944,0.00226145,0.08611052,0.301007

96\\0.00005356,0.00017947,0.00002855,-0.00001714,-0.00002494,-0.000019

01,-0.00000804,-0.00005993,0.00001525,-0.00001756,-0.00006372,0.000000

05,0.00003095,-0.00000716,-0.00000168,-0.00001073,-0.00000447,0.000016

08,-0.00000572,0.00000322,-0.00000618,-0.00001733,-0.00001040,0.000002

05,-0.00000729,0.00000885,-0.00001086,0.00000520,-0.00000604,-0.000008

84,0.00000311,-0.00001606,-0.00000854,0.00000616,0.00000130,-0.0000008

3,-0.00001519,-0.00000012,-0.00000603\\\@

**H2N. – CBS-QB3**

Temperature= 298.150000 Pressure= 1.000000

E(ZPE)= 0.018685 E(Thermal)= 0.021522

E(SCF)= -55.585038 DE(MP2)= -0.180966

DE(CBS)= -0.019294 DE(MP34)= -0.017688

DE(CCSD)= -0.003505 DE(Int)= 0.006406

DE(Empirical)= -0.009775

CBS-Q (0 K)= -55.791175 CBS-Q Energy= -55.788338

CBS-Q Enthalpy= -55.787394 CBS-Q Free Energy= -55.810157

1|1|UNPC-UNK|Mixed|CBS-QB3|CBS-QB3|H2N1(2)|PCUSER|21-Dec-1999|0||#N CB

S-QB3 TEST||radicale NH2||0,2|N,-0.1176763104,0.,-0.0829057766|H,-0.05

01048159,0.,0.9456656448|H,0.8738389885,0.,-0.3653252086||Version=x86-

Win32-G98RevA.7|State=2-A"|HF/CbsB3=-55.5850379|E2(CBS)/CbsB3=-0.20025

99|CBS-Int/CbsB3=0.0064063|OIii/CbsB3=1.6726419|MP2/CbsB4=-55.7180584|

MP4(SDQ)/CbsB4=-55.7357467|MP4(SDQ)/6-31+G(d')=-55.7129751|QCISD(T)/6-

31+G(d')=-55.7164796|CBSQB3=-55.791175|FreqCoord=-0.222375982,0.,-0.15

66692006,-0.0946843727,0.,1.7870489454,1.6513162464,0.,-0.690364541|PG

=CS [SG(H2N1)]|NImag=0||0.40475747,-0.00000808,0.00004617,-0.06391297,

-0.00000038,0.45112776,-0.03830477,0.00000286,-0.05256228,0.04205423,0

.00000390,0.00000473,0.00000026,-0.00000114,-0.00001801,-0.00079349,0.

00000265,-0.38992058,0.00837406,-0.00000136,0.40674322,-0.36645269,0.0

0000522,0.11647526,-0.00374946,-0.00000275,-0.00758057,0.37020214,0.00

000418,-0.00005089,0.00000012,-0.00000172,0.00001328,-0.00000129,-0.00

000247,0.00003761,0.06470647,-0.00000227,-0.06120717,0.04418822,0.0000

0110,-0.01682264,-0.10889469,0.00000117,0.07802981||-0.00001186,0.,0.0

0011250,-0.00000480,0.,-0.00011028,0.00001666,0.,-0.00000223|||@
